# Supplementary material
Source: PubMed Central journal article supplement (PMC10518034)
Supplement: NIHMS1895565-supplement-1.pdf [file NIHMS1895565-supplement-1.pdf]

**Cell Reports, Volume 42**

**Supplemental information**

**Time-resolved correlation of distributed brain  
activity tracks E-I balance and accounts for  
diverse scale-free phenomena**

**Aditya Nanda, Graham W. Johnson, Yu Mu, Misha B. Ahrens, Catie Chang, Dario J. Englot, Michael Breakspear, and Mikail Rubinov**

## Supplementary Figures

### **Supplementary Figures 1-4. Properties of time-resolved measures.**

These figures show histograms of time-resolved mean, variance, and correlation, pooled across all recordings in each modality. They also show scatter plots and Spearman correlation coefficients between these quantities, for a representative recording in each modality.

### **Supplementary Figures 5-8. Extension of Figure 5.**

For completeness, these figures show results on dynamical stability for all models across all four macaque electroencephalography recordings.

### **Supplementary Figures 9-20. Extension of Figure 6.**

For completeness, these figures show results on  $1/f$  spectra and long-range temporal correlations for all models across all intracranial EEG recordings, with five randomly chosen channels in each recording.

### **Supplementary Figures 21-33. Extension of Figures 7-8.**

For completeness, these figures show results on avalanche statistics (avalanche sizes, durations, size-duration scaling, and shape collapse) for all models across all recordings.

## Properties of time-resolved measures in human stereotactic EEG

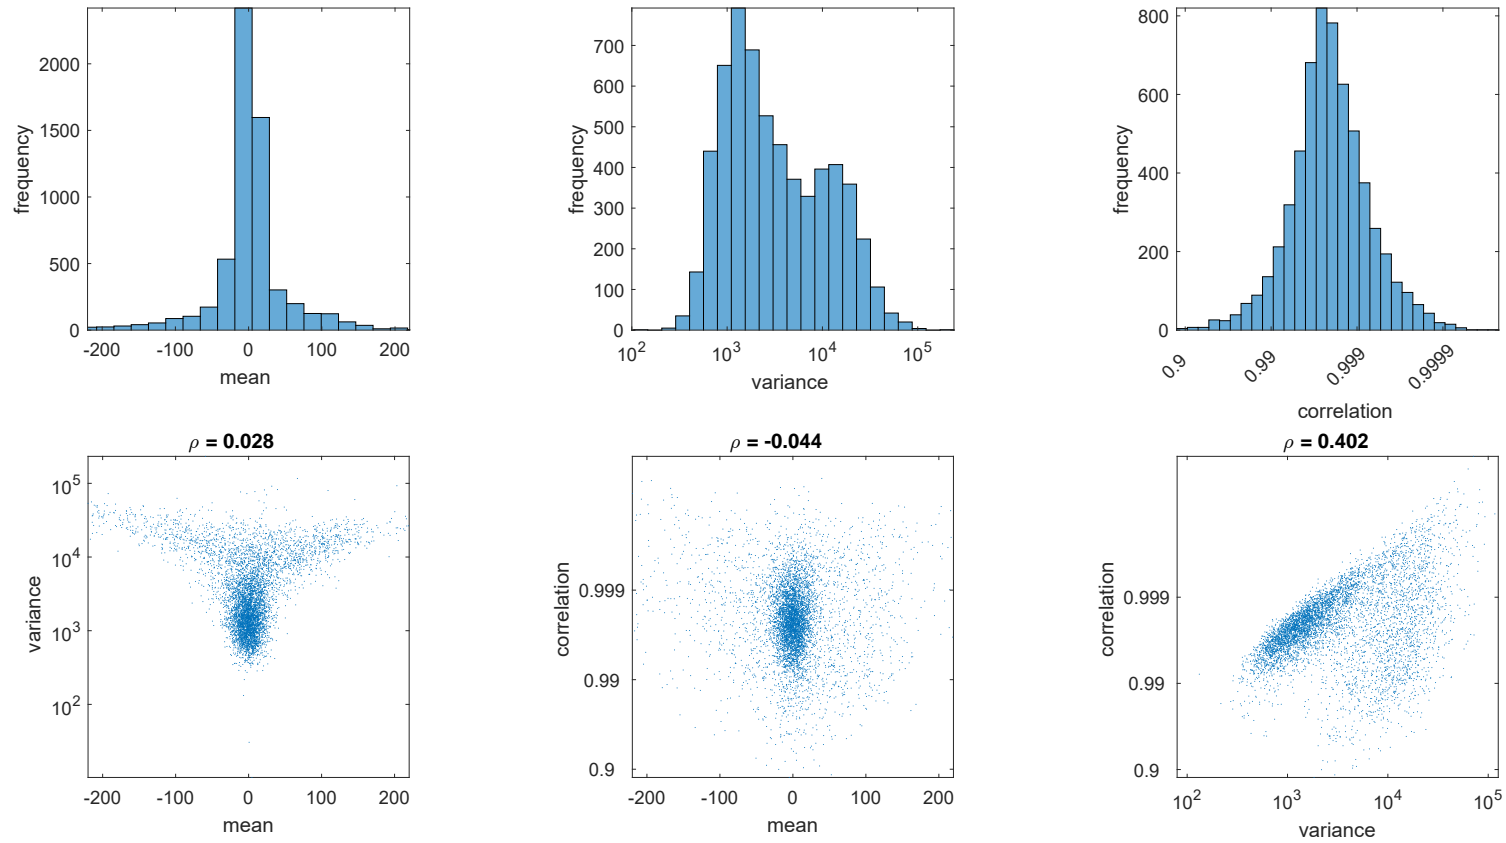

Supplementary Figure 1: Histograms and scatter plots of time-resolved mean, variance, and correlation.  $\rho$  denotes Spearman correlation coefficient.

## Properties of time-resolved measures in human intracranial EEG

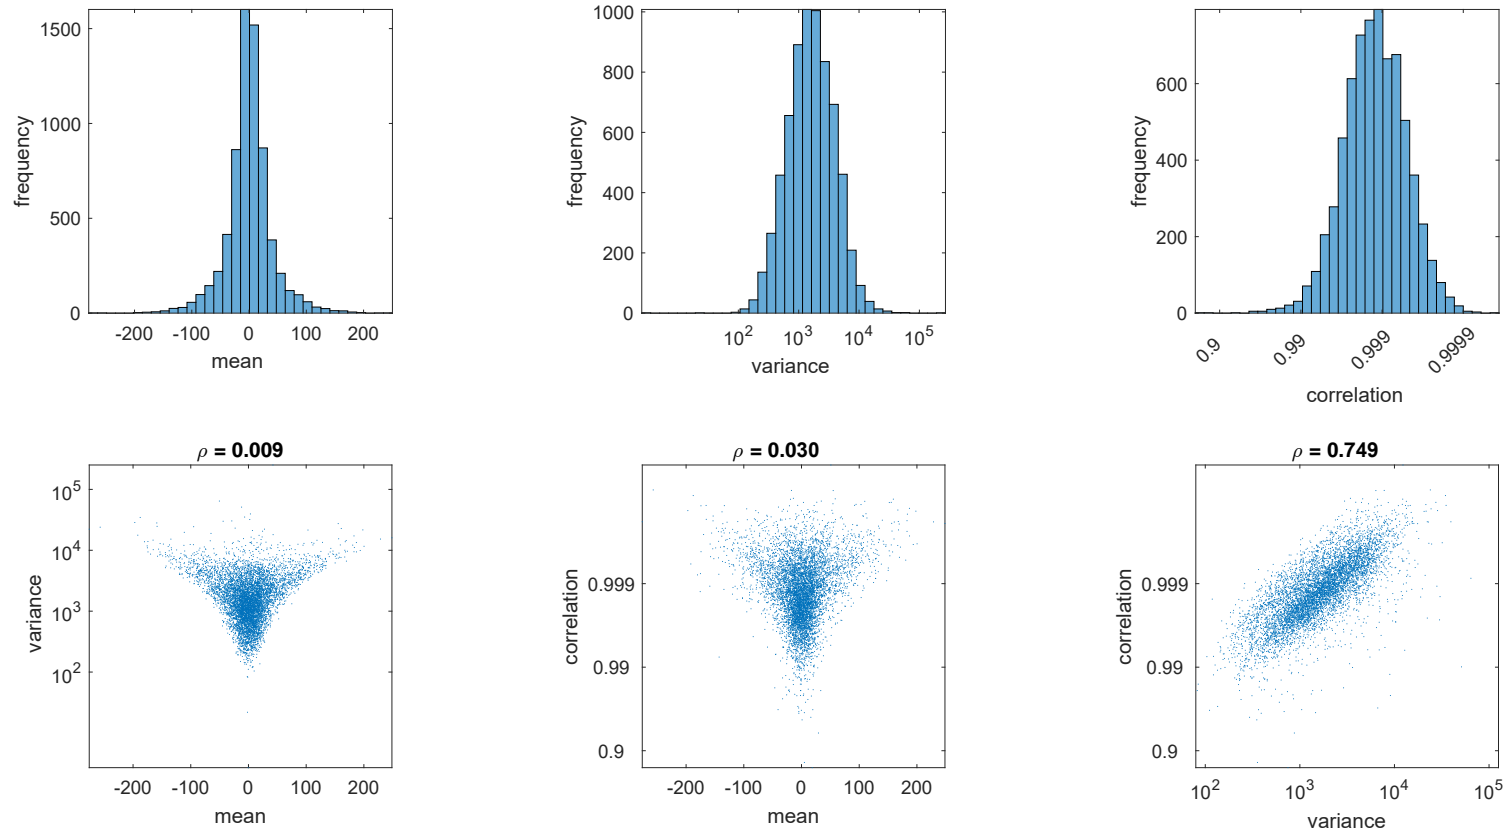

Supplementary Figure 2: Histograms and scatter plots of time-resolved mean, variance, and correlation.  $\rho$  denotes Spearman correlation coefficient.

## Properties of time-resolved measures in macaque electrocortigraphy

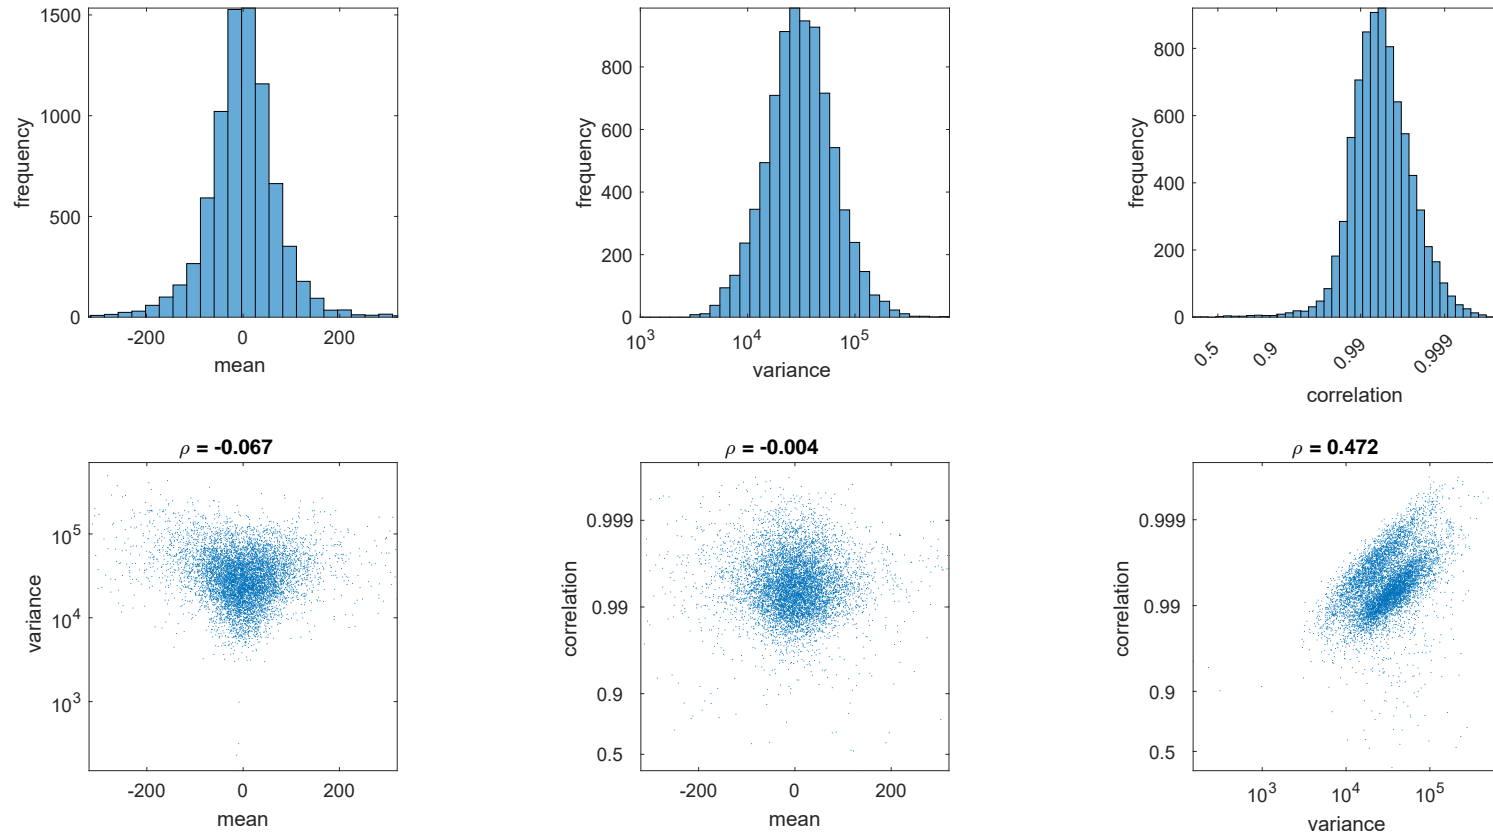

Supplementary Figure 3: Histograms and scatter plots of time-resolved mean, variance, and correlation.  $\rho$  denotes Spearman correlation coefficient.

## Properties of time-resolved measures in zebrafish calcium imaging

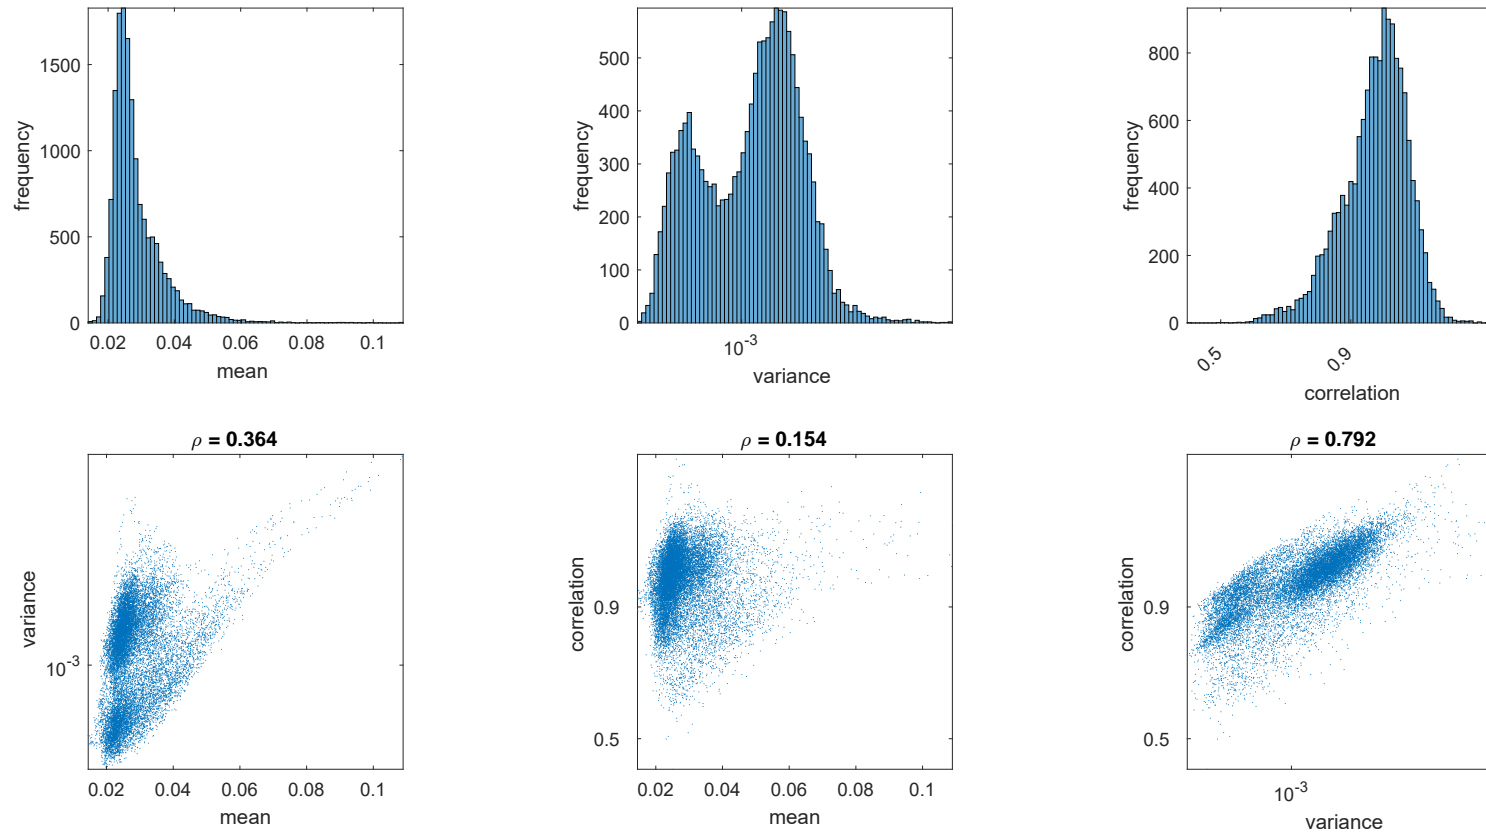

Supplementary Figure 4: Histograms and scatter plots of time-resolved mean, variance, and correlation.  $\rho$  denotes Spearman correlation coefficient.

# Weakly stable dynamics — macaque 1/session 1

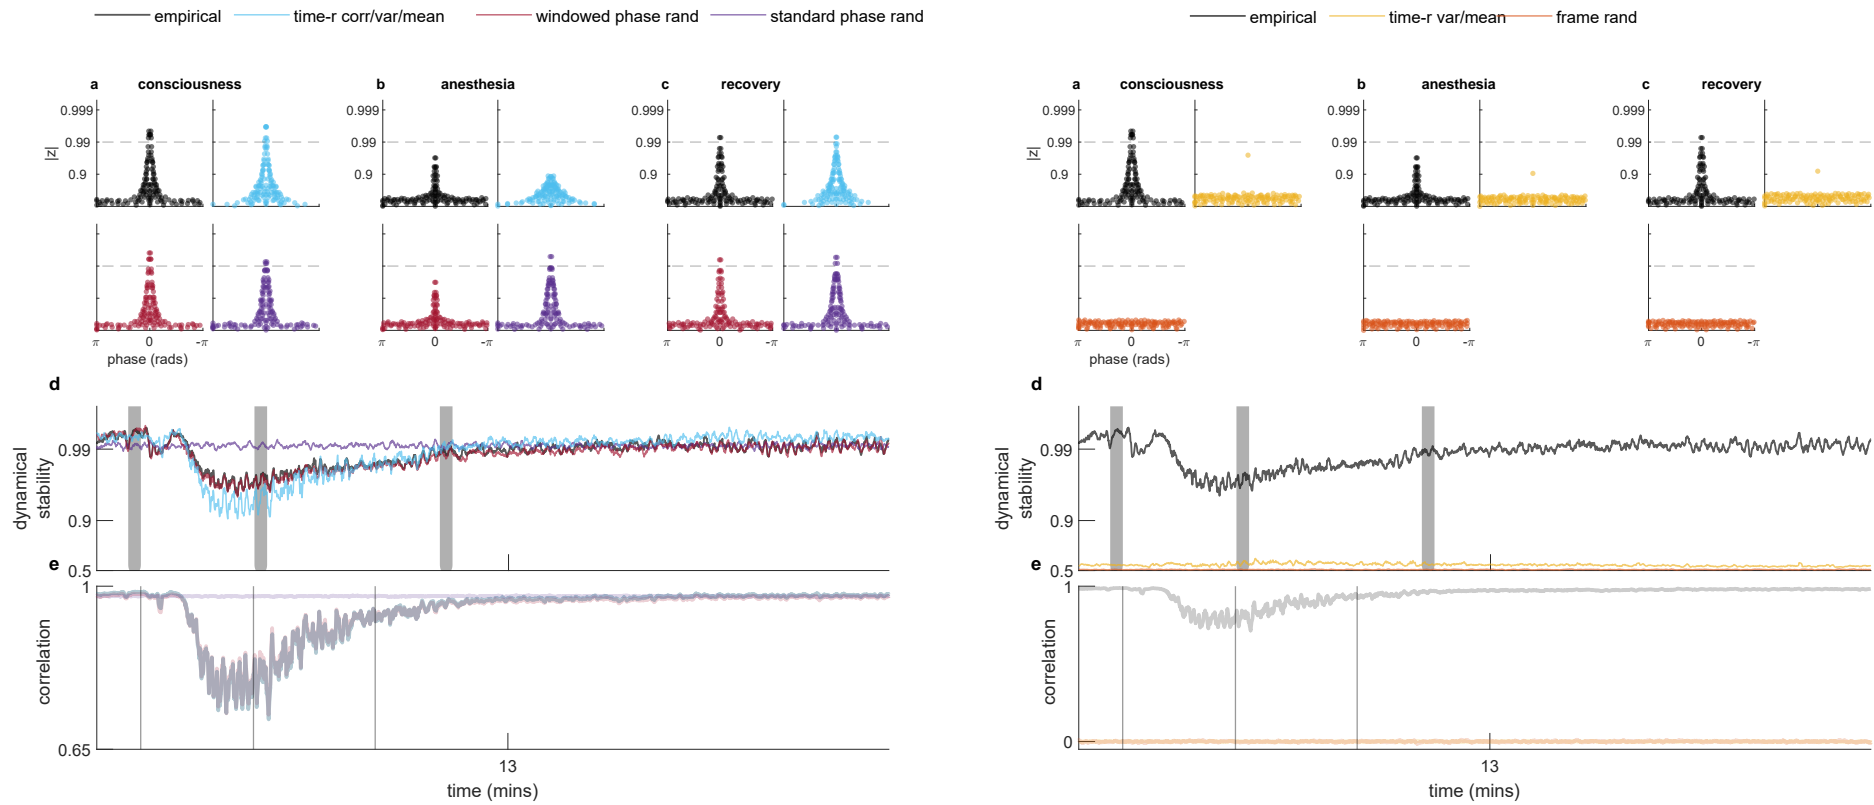

Supplementary Figure 5: See Figure 5 caption for details.

## Weakly stable dynamics — macaque 1/session 2



Supplementary Figure 6: See Figure 5 caption for details.



## Weakly stable dynamics — macaque 2/session 1

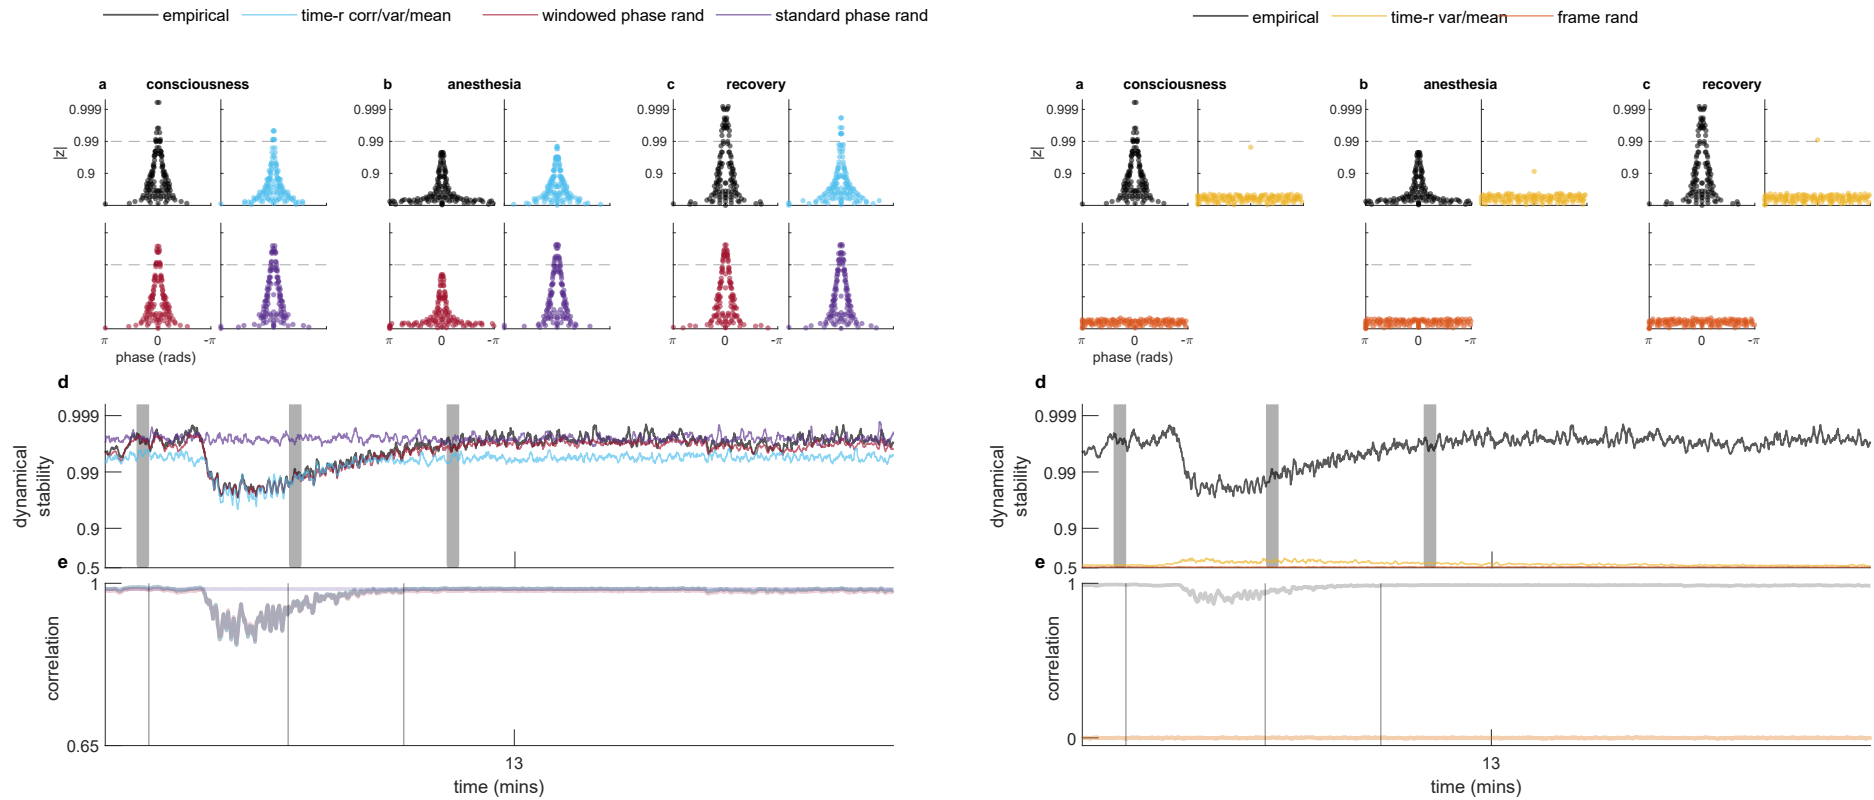

Supplementary Figure 7: See Figure 5 caption for details.

## Weakly stable dynamics— macaque 2/session 2

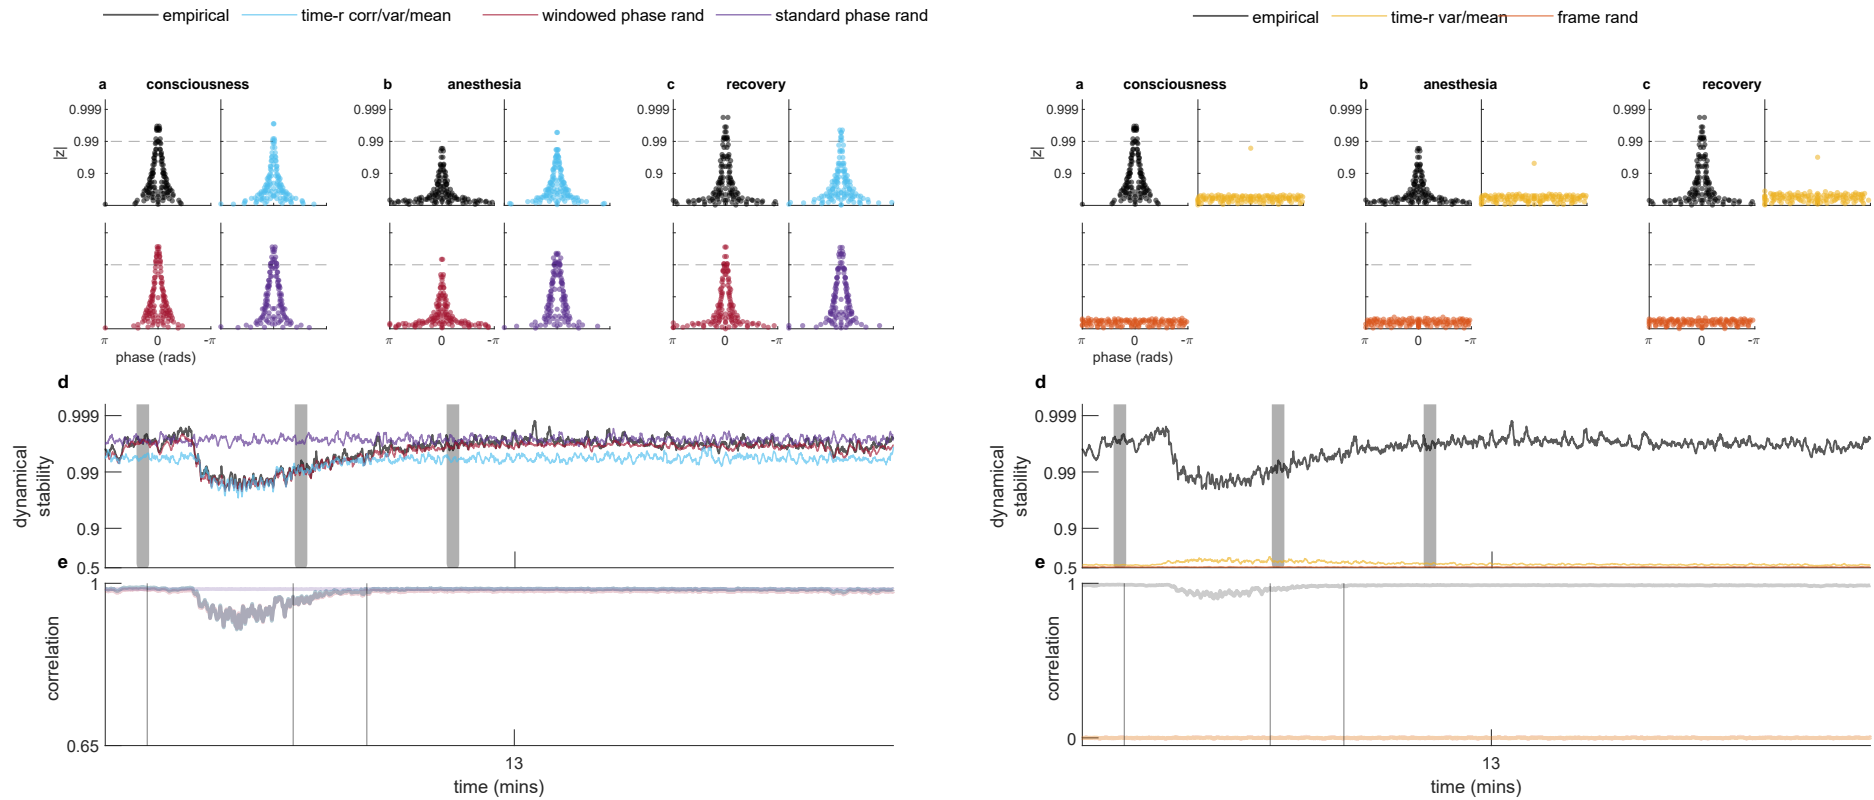

Supplementary Figure 8: See Figure 5 caption for details.

# Scale-free statistics — macaque 1/session 1

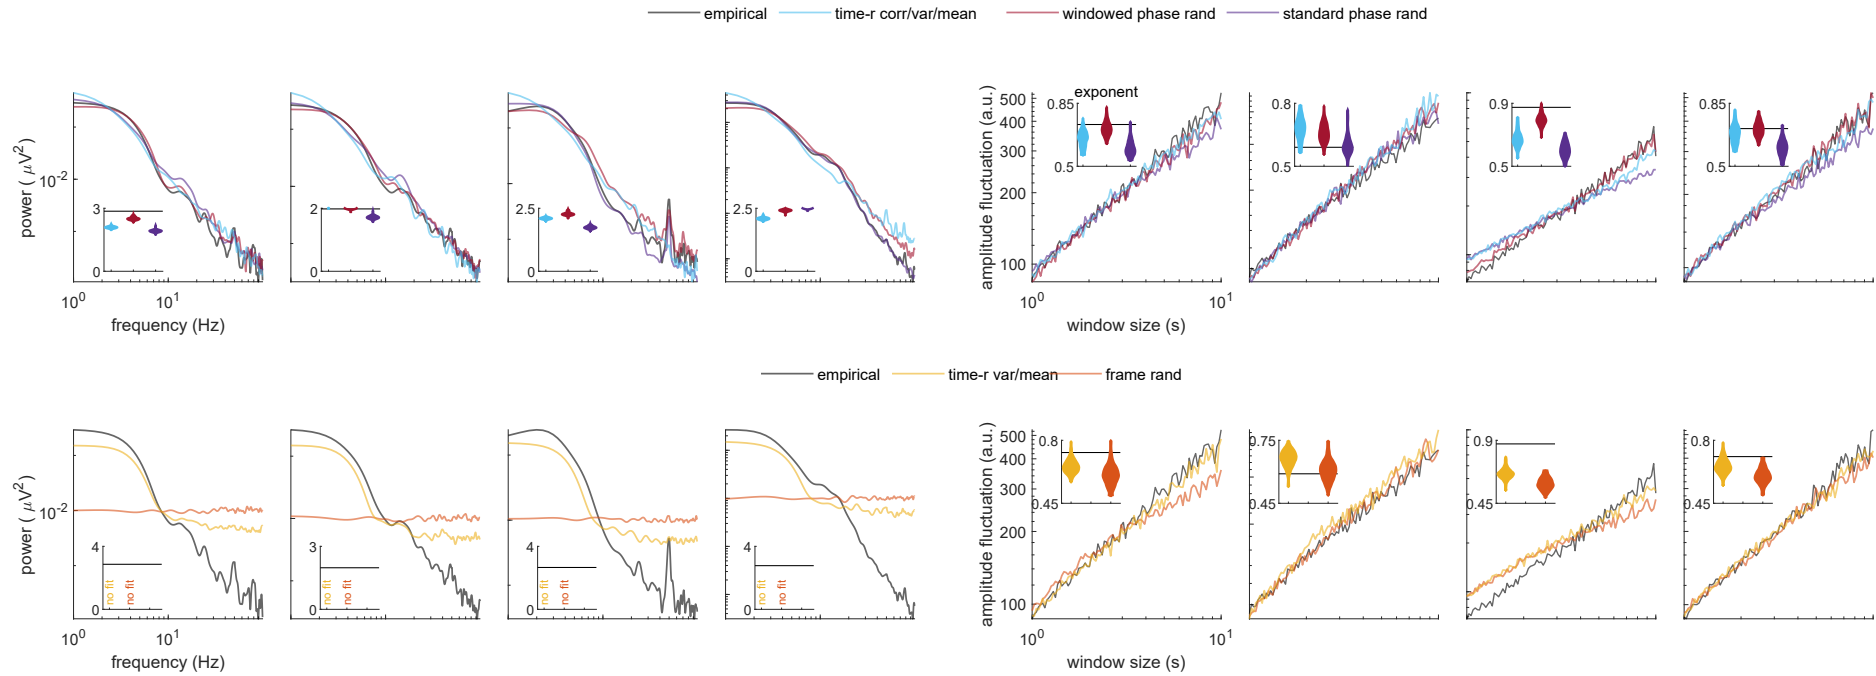

Supplementary Figure 9: See Figure 6 caption for details.

## Scale-free statistics — macaque 1/session 2

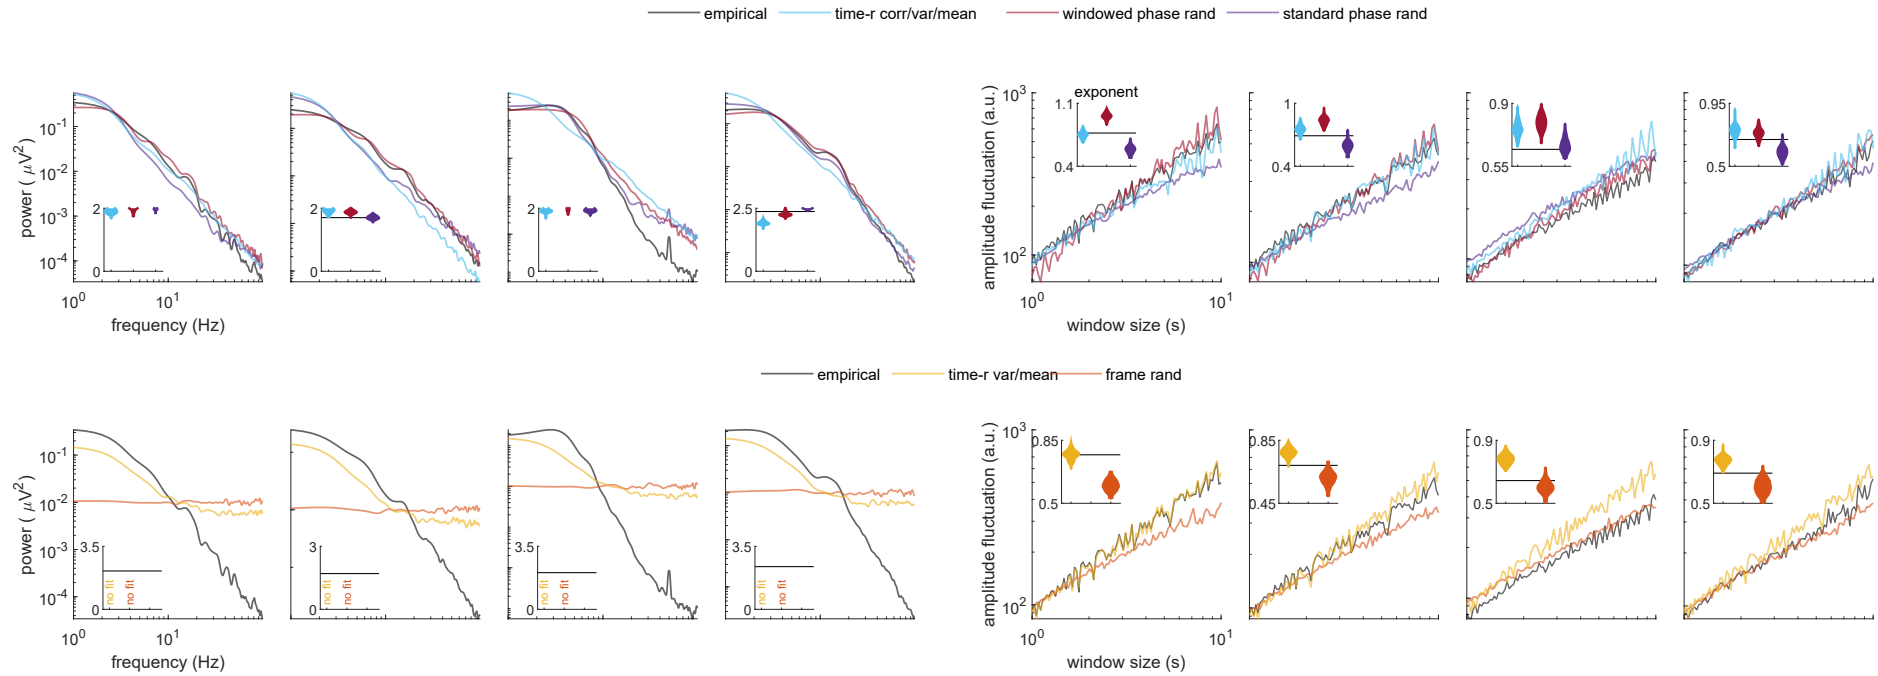

Supplementary Figure 10: See Figure 6 caption for details.

# Scale-free statistics — macaque 2/session 1

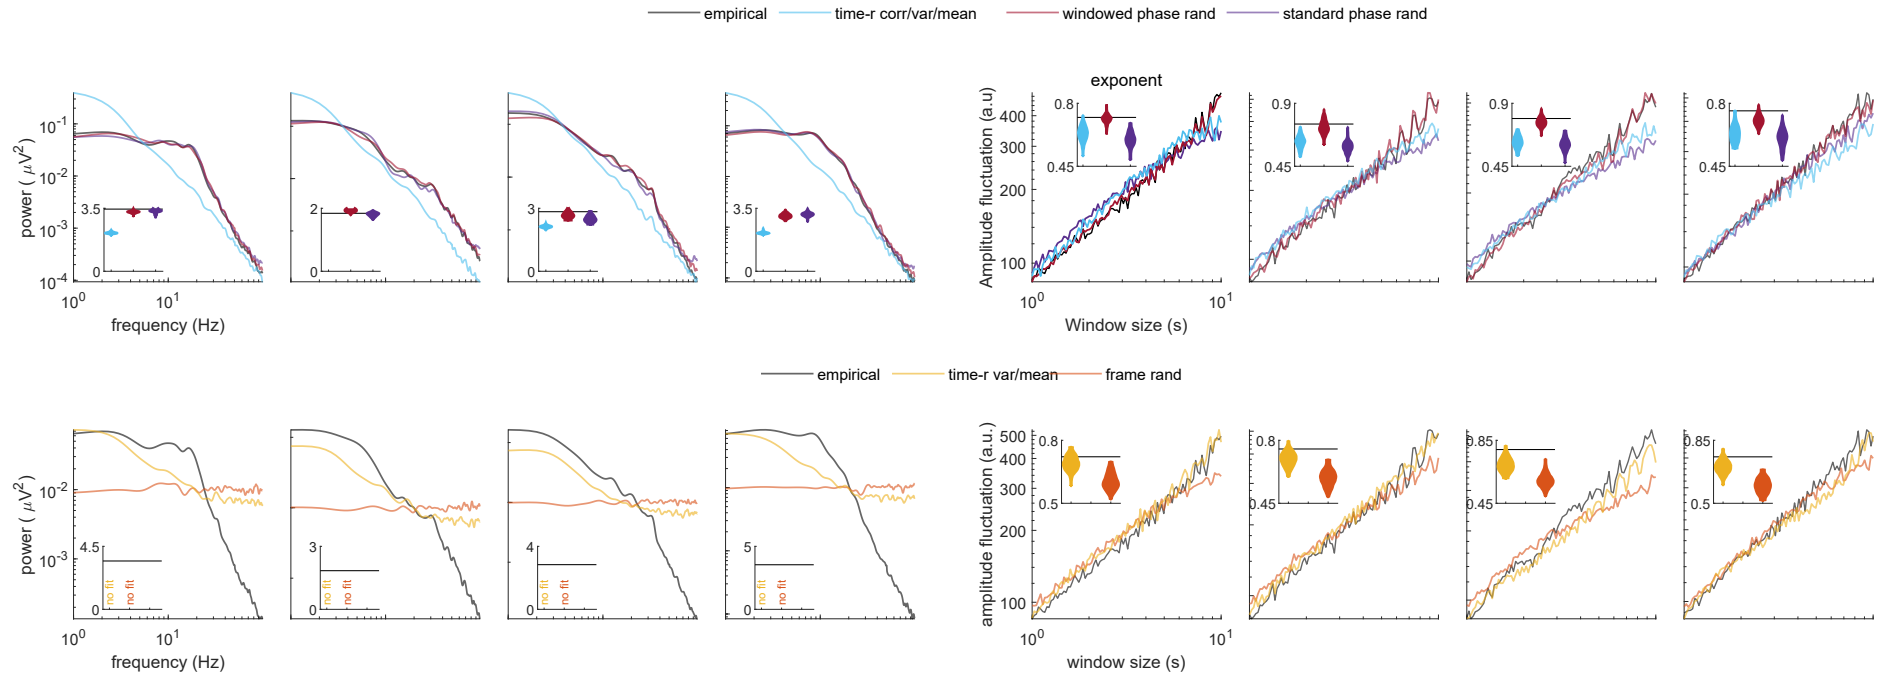

Supplementary Figure 11: See Figure 6 caption for details.

## Scale-free statistics — macaque 2/session 2

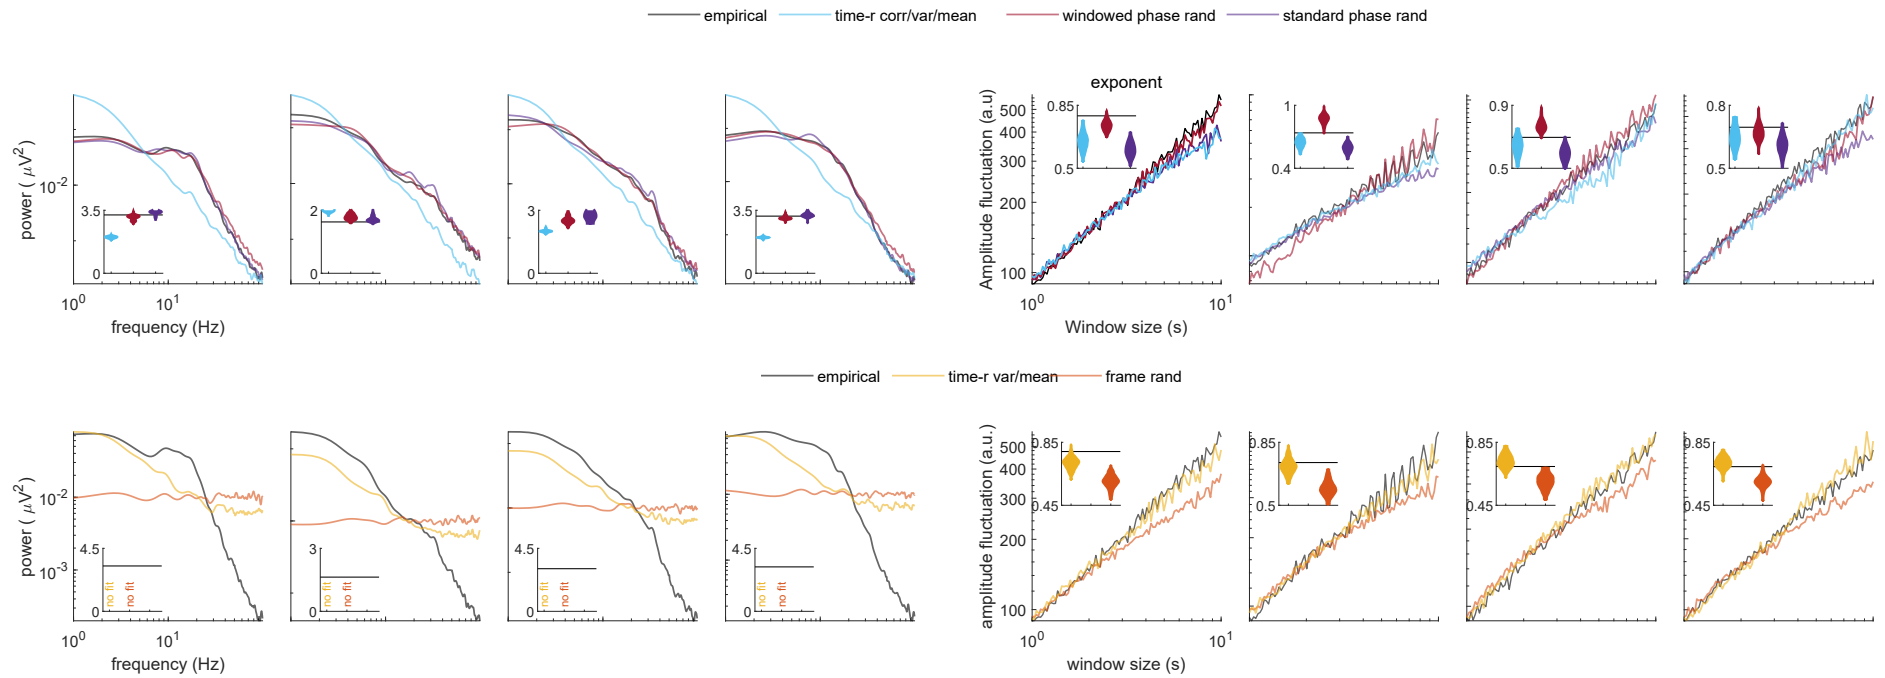

Supplementary Figure 12: See Figure 6 caption for details.

# Scale-free statistics — human intracranial EEG dataset 1

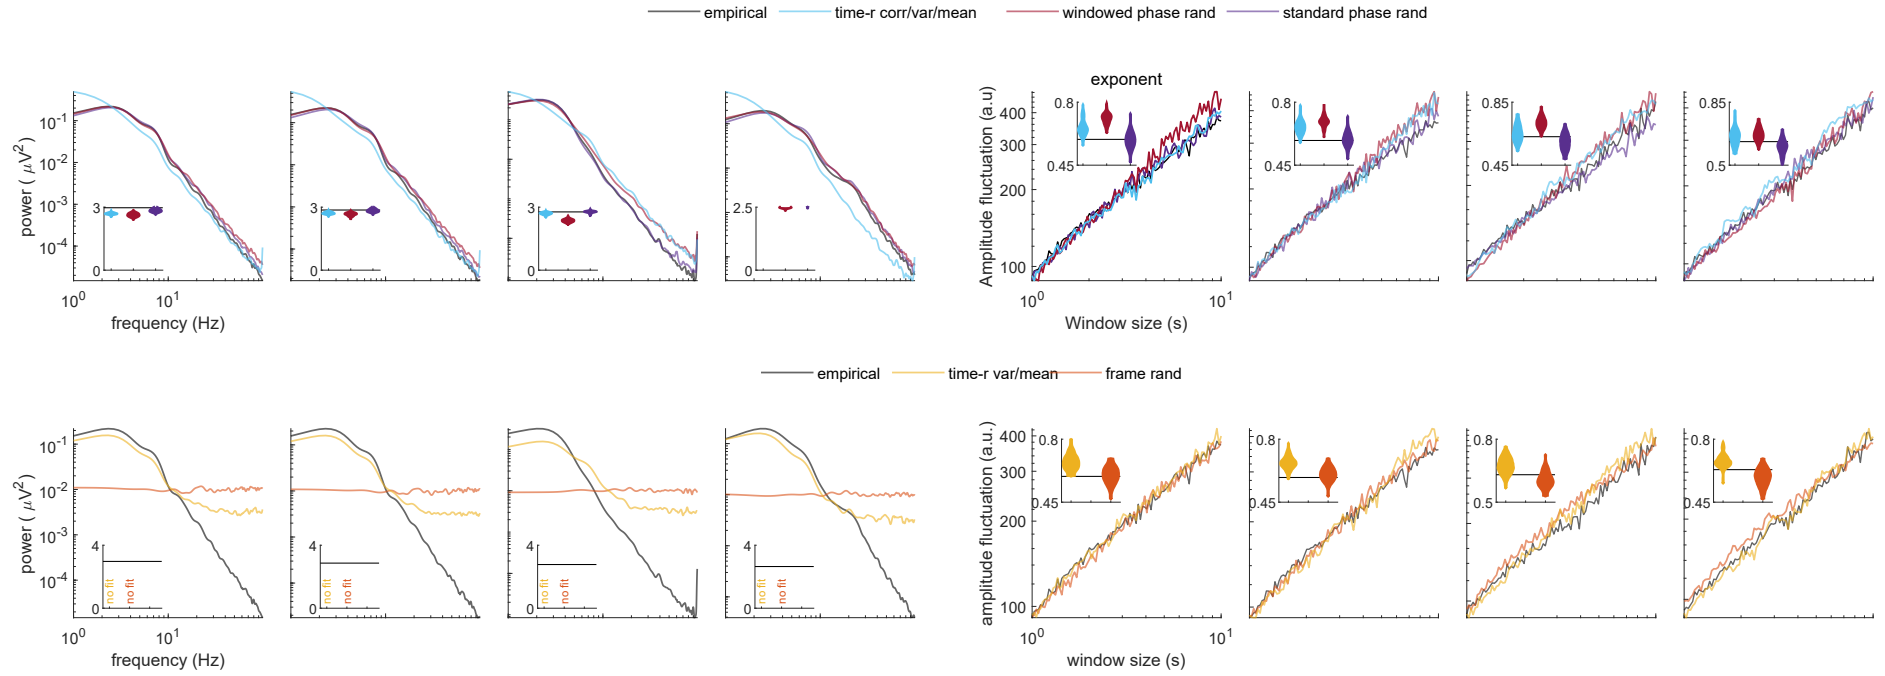

Supplementary Figure 13: See Figure 6 caption for details.

## Scale-free statistics — human intracranial EEG dataset 2

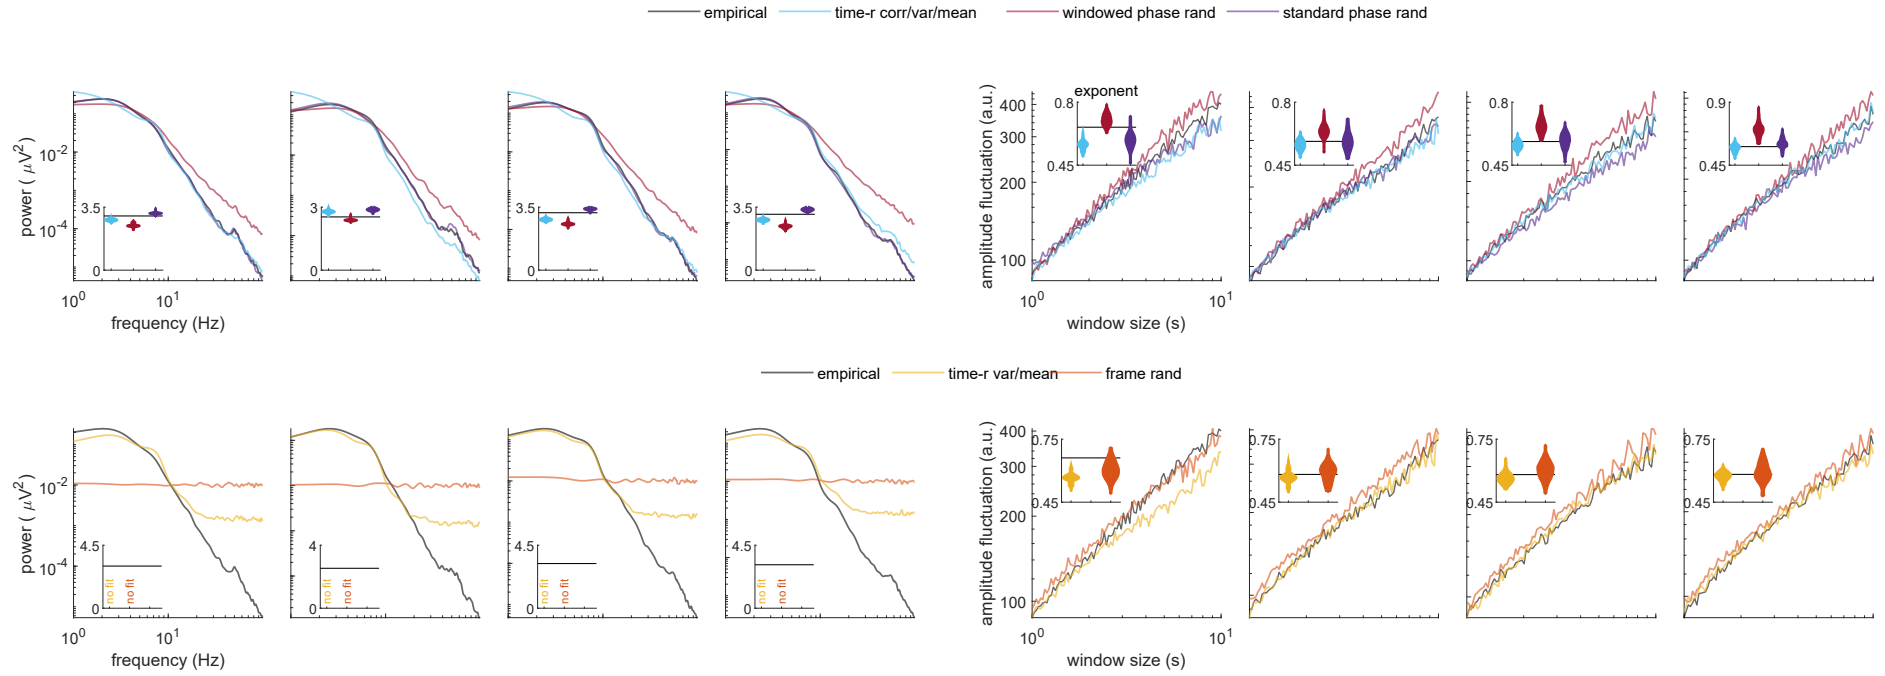

Supplementary Figure 14: See Figure 6 caption for details.



## Scale-free statistics — human intracranial EEG dataset 3

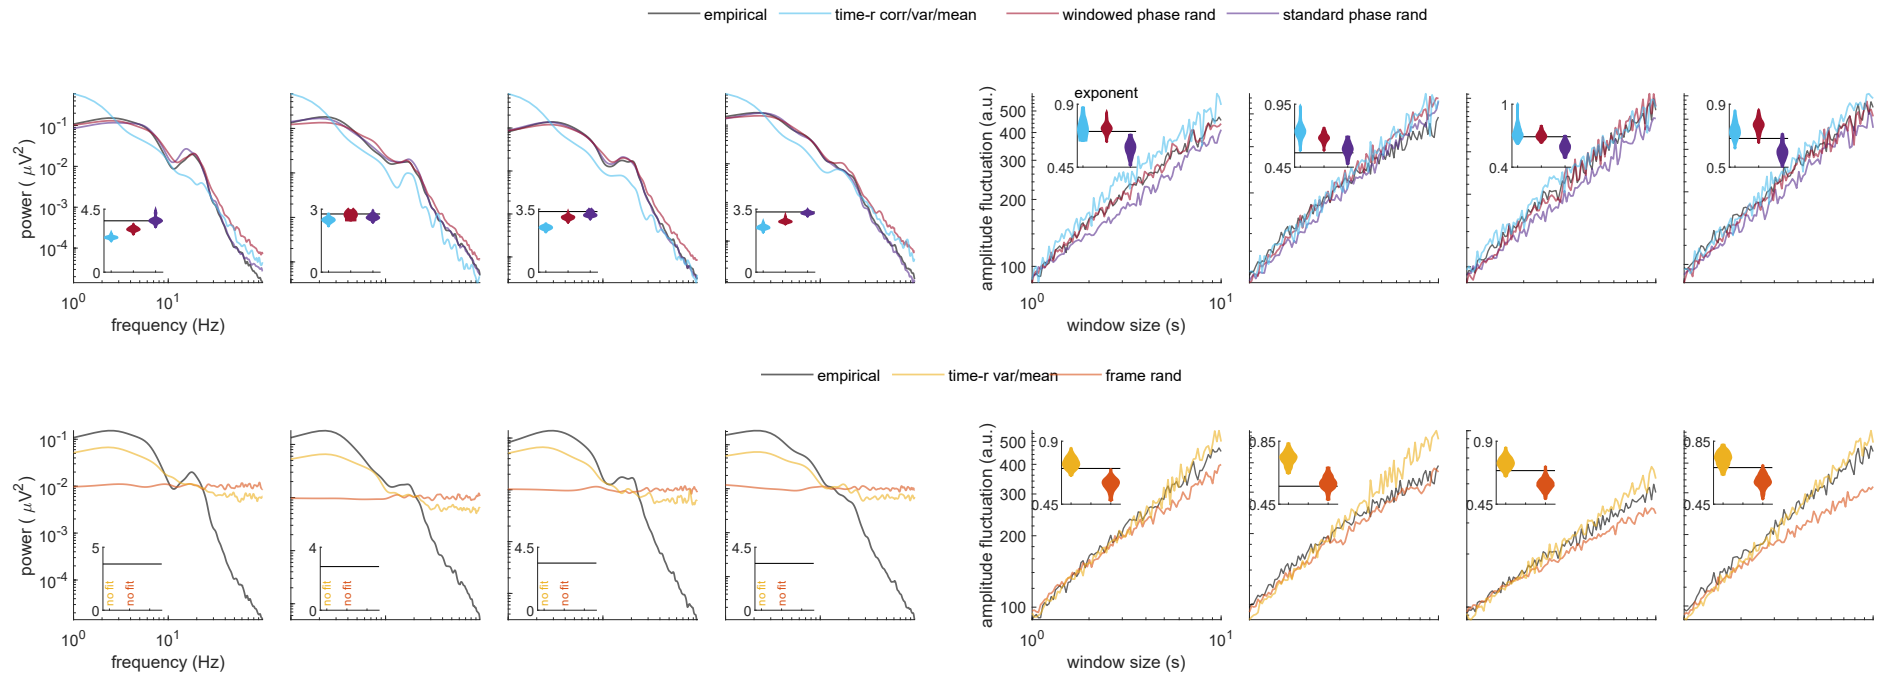

Supplementary Figure 15: See Figure 6 caption for details.

## Scale-free statistics — human intracranial EEG dataset 4

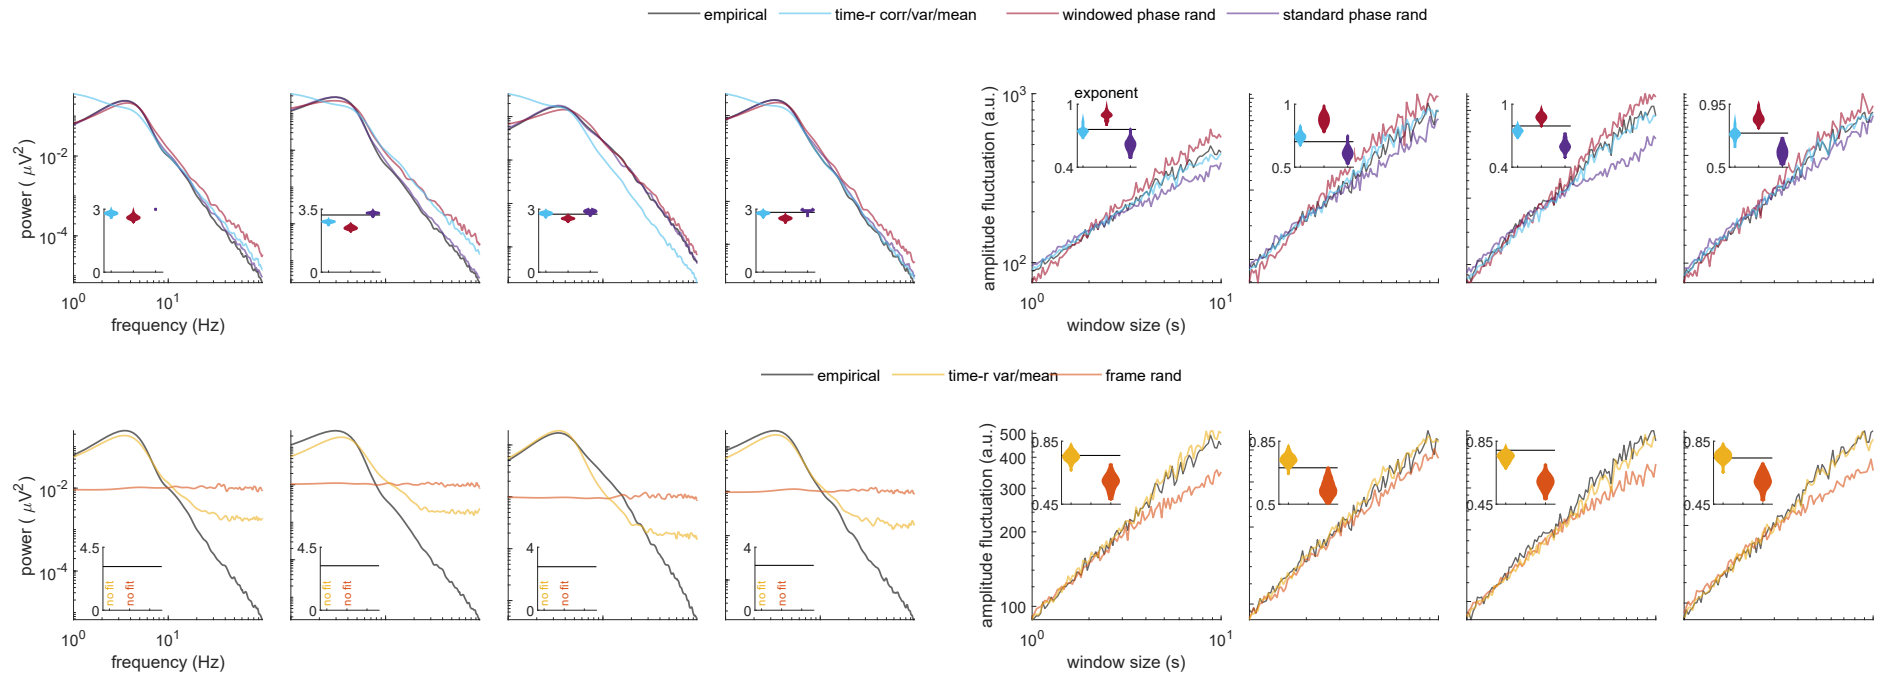

Supplementary Figure 16: See Figure 6 caption for details.

# Scale-free statistics — human stereotactic EEG dataset 1

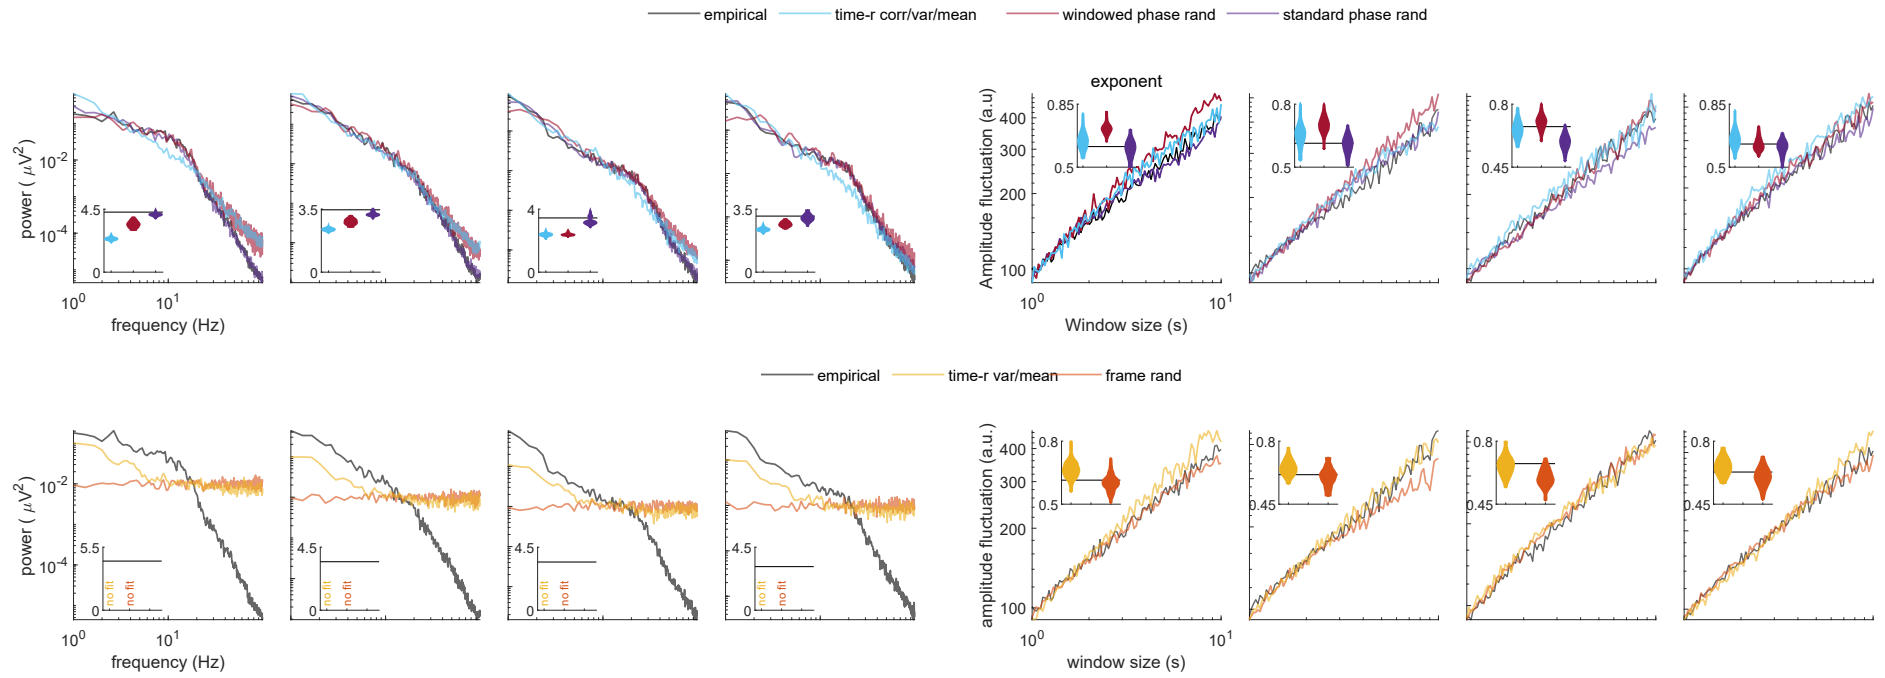

Supplementary Figure 17: See Figure 6 caption for details.

## Scale-free statistics — human stereotactic EEG dataset 2

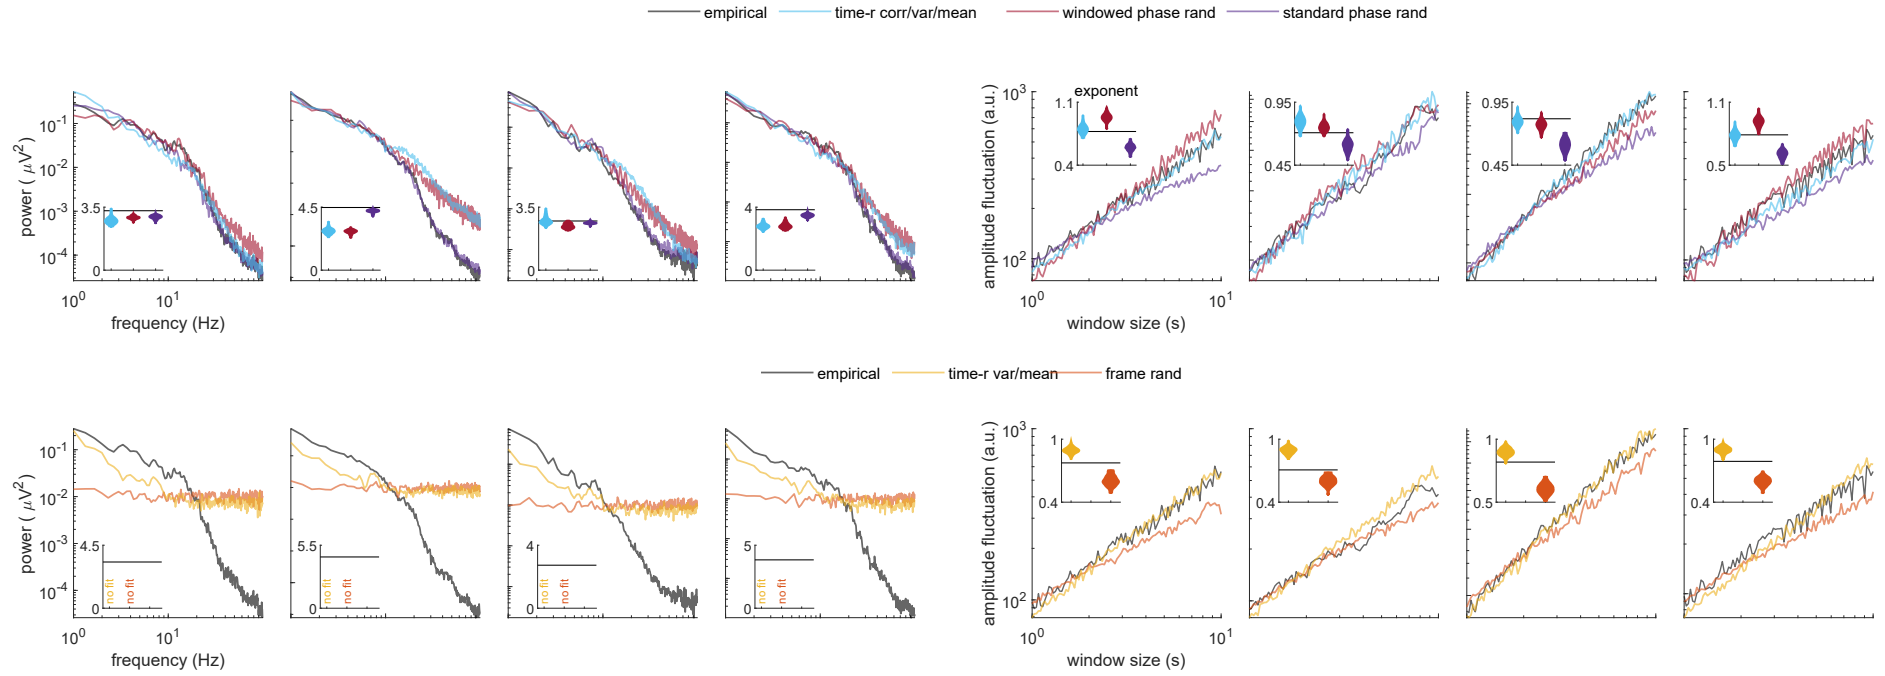

Supplementary Figure 18: See Figure 6 caption for details.

### Scale-free statistics — human stereotactic EEG dataset 3

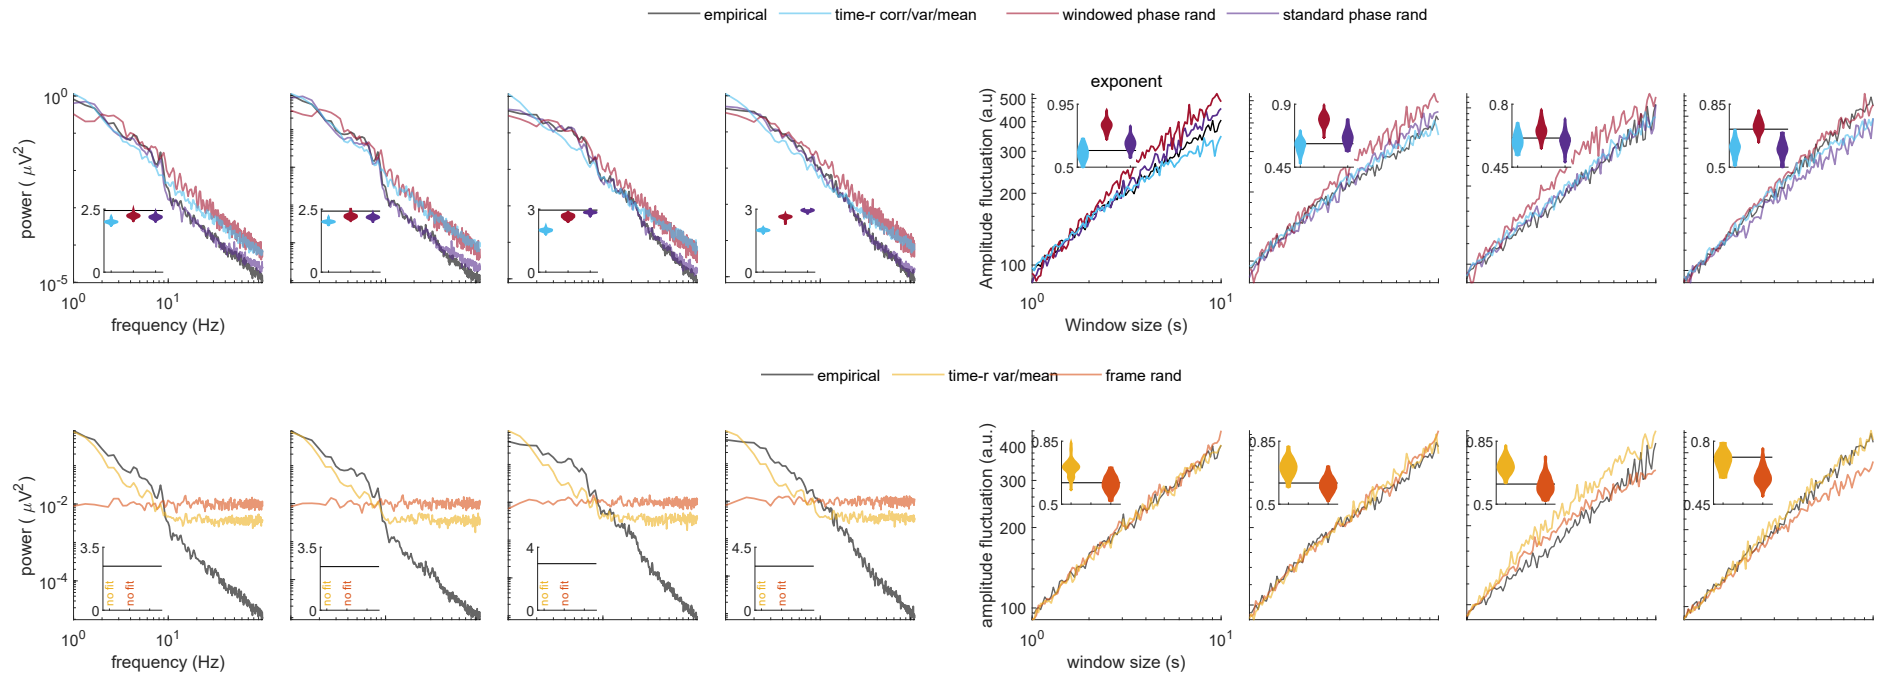

Supplementary Figure 19: See Figure 6 caption for details.

## Long-range temporal correlations (beta band) — human stereotactic EEG dataset 1

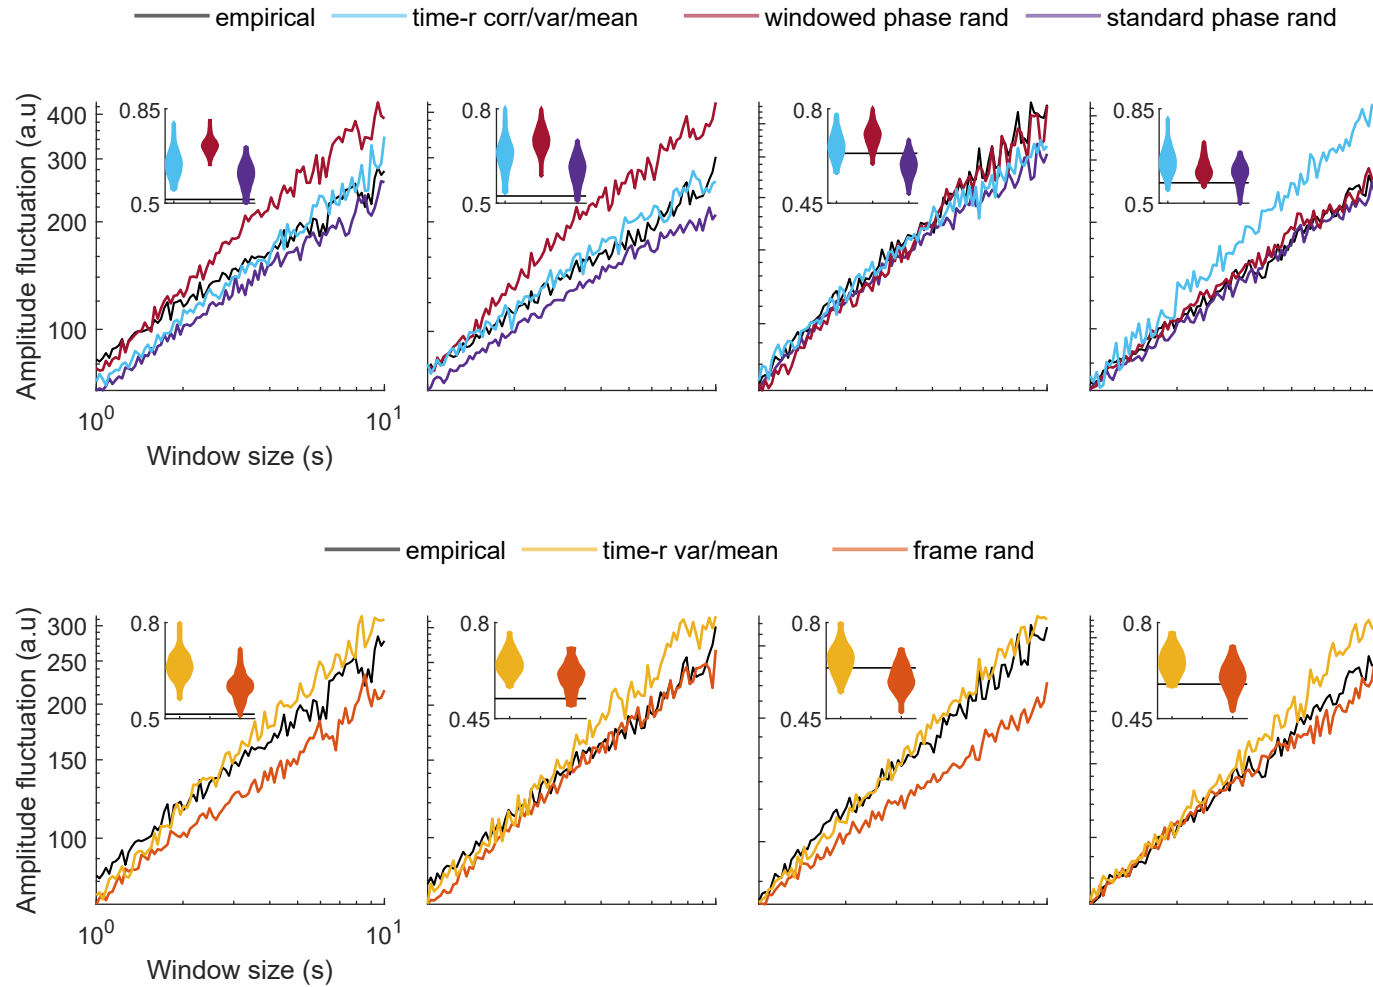

Supplementary Figure 20: Long-range temporal correlations in the beta band for one representative dataset. See Figure 6 caption for details.

## Avalanche statistics — macaque 1/session 1

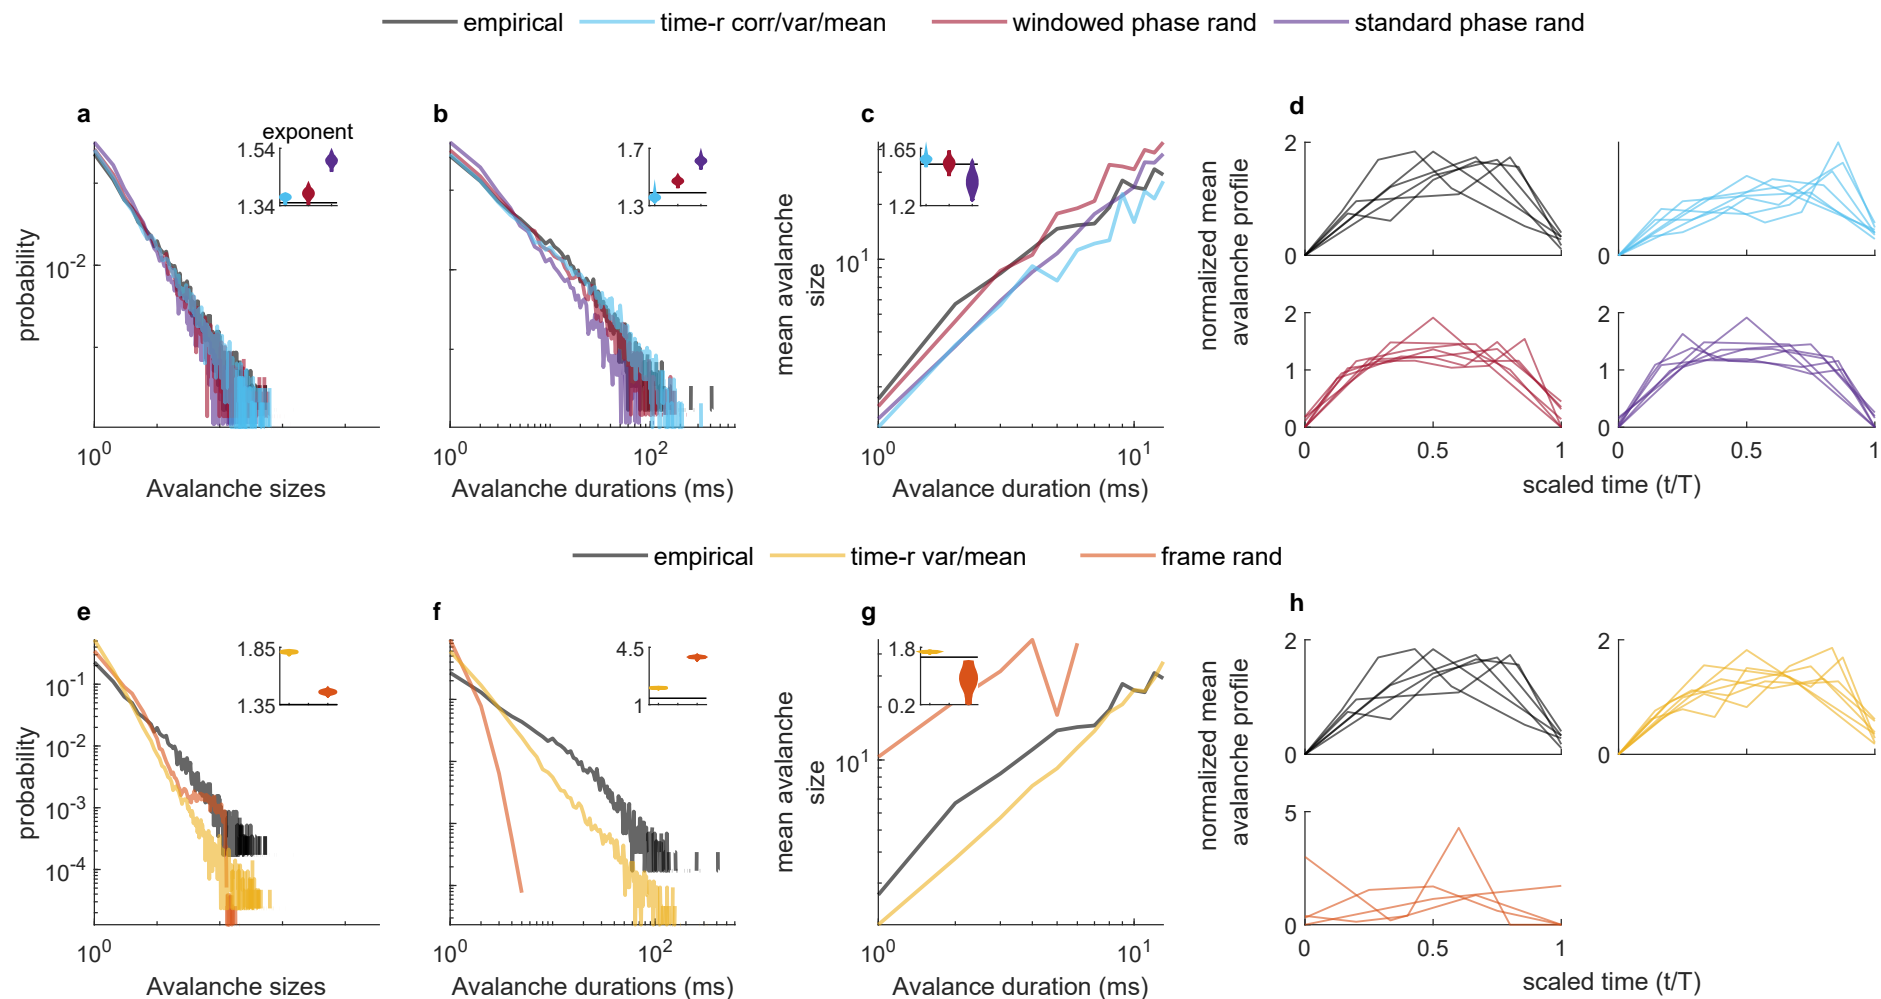

Supplementary Figure 21: See Figures 7-8 caption for details.

## Avalanche statistics — macaque 1/session 2

— empirical   
 — time-r corr/var/mean   
 — windowed phase rand   
 — standard phase rand

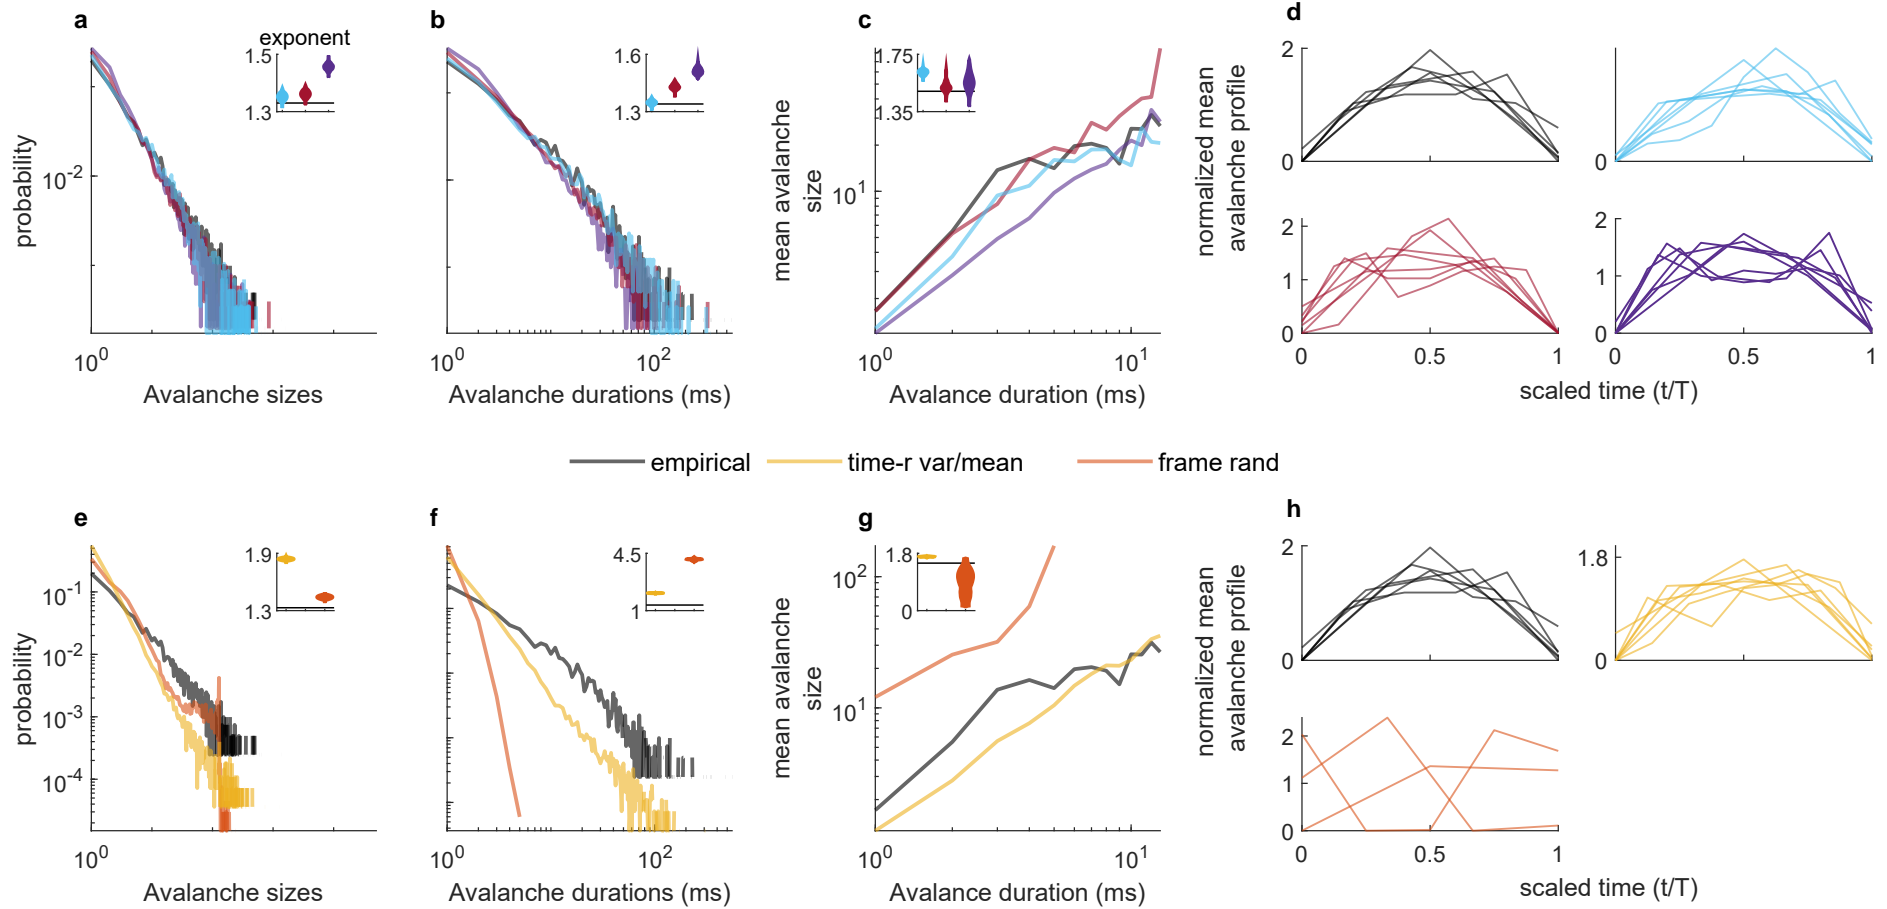

Supplementary Figure 22: See Figures 7-8 caption for details.



## Avalanche statistics — macaque 2/session 1

— empirical   
 — time-r corr/var/mean   
 — windowed phase rand   
 — standard phase rand

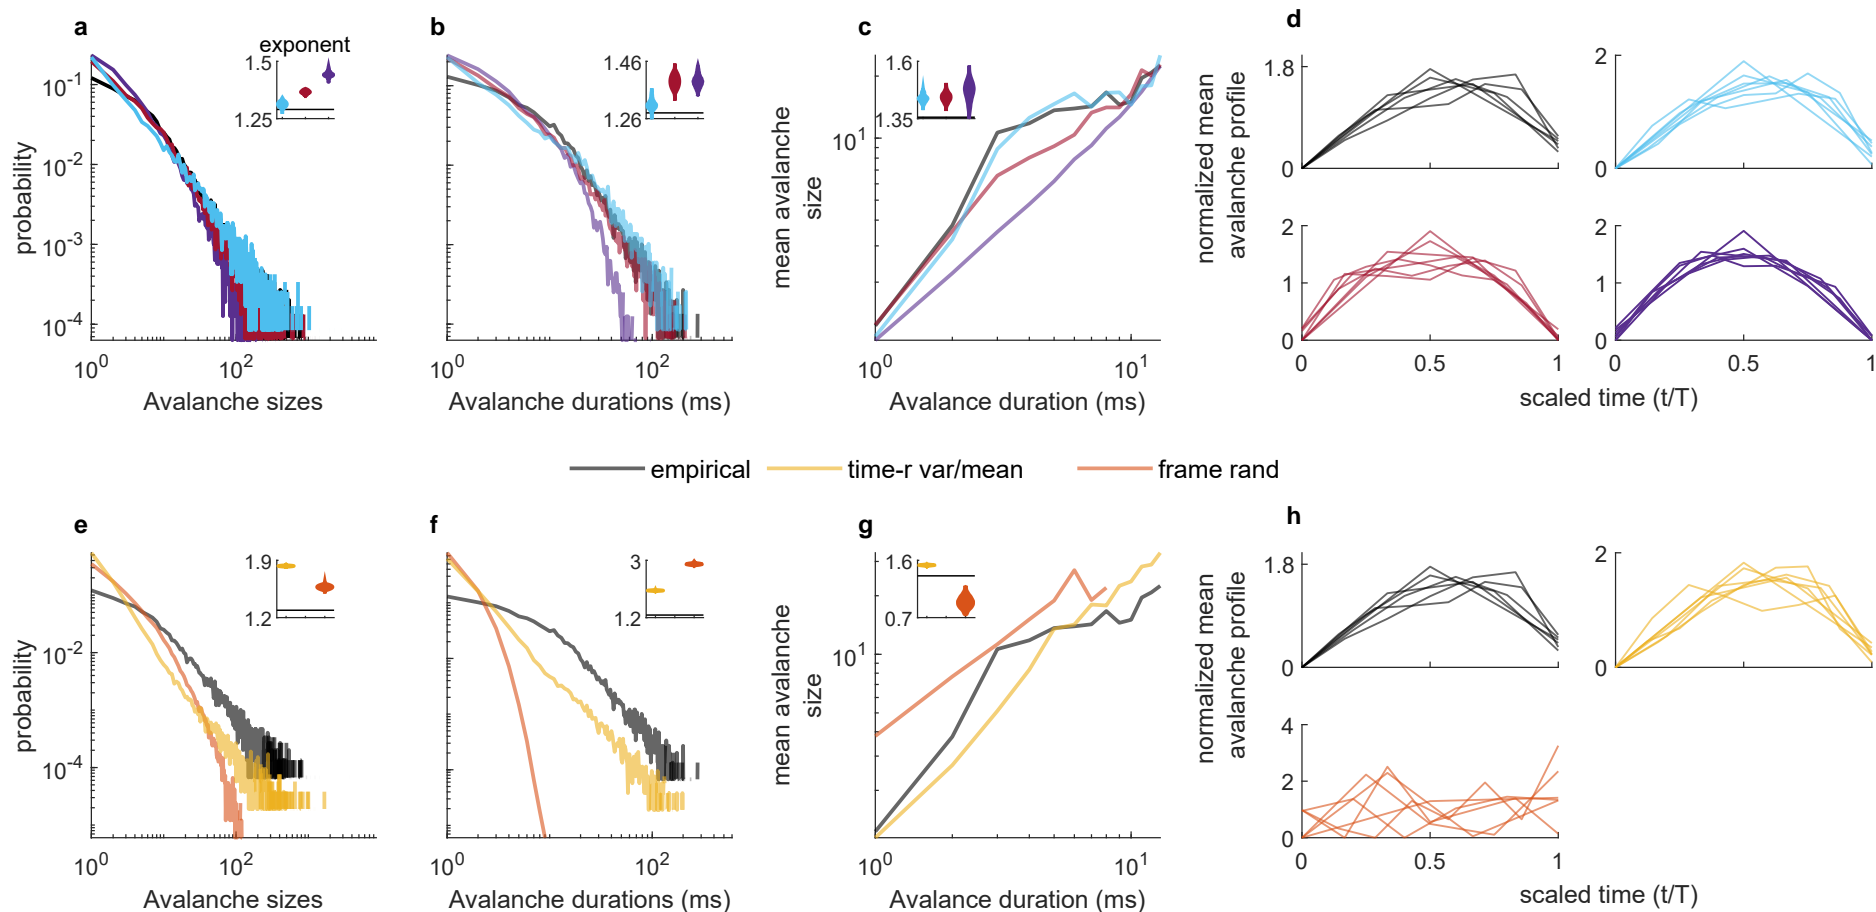

Supplementary Figure 23: See Figures 7-8 caption for details.

## Avalanche statistics — macaque 2/session 2

— empirical   
 — time-r corr/var/mean   
 — windowed phase rand   
 — standard phase rand

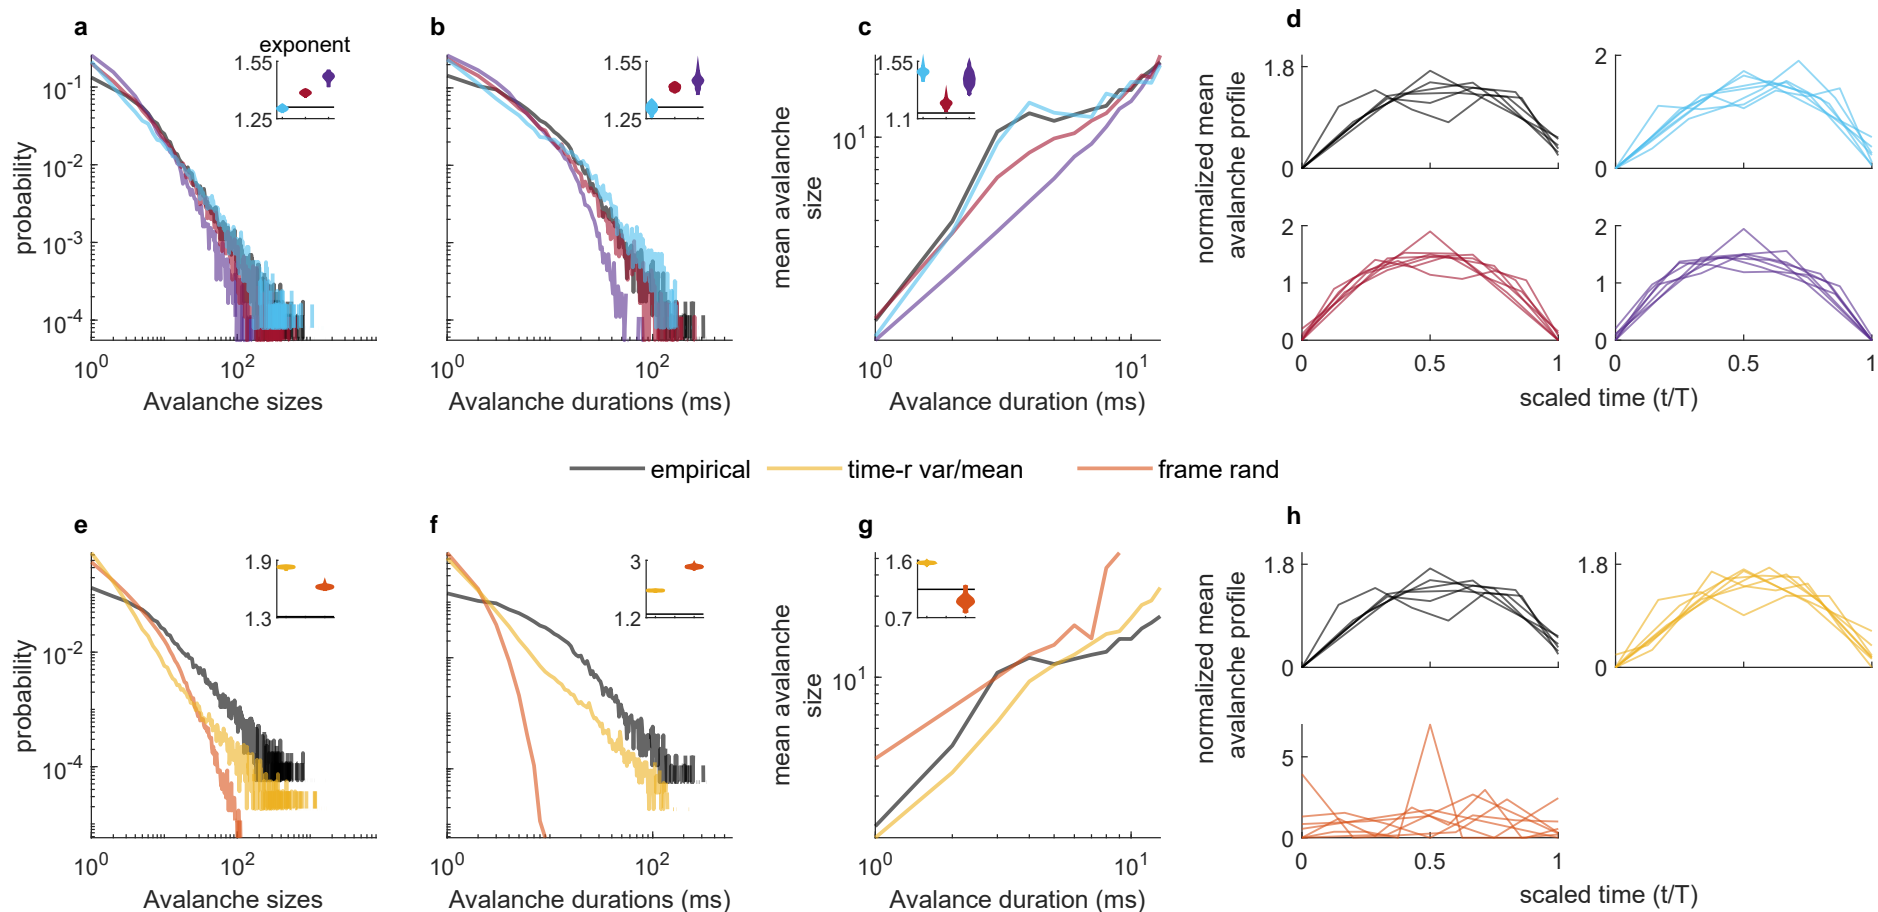

Supplementary Figure 24: See Figures 7-8 caption for details.

## Avalanche statistics — human intracranial EEG dataset 1

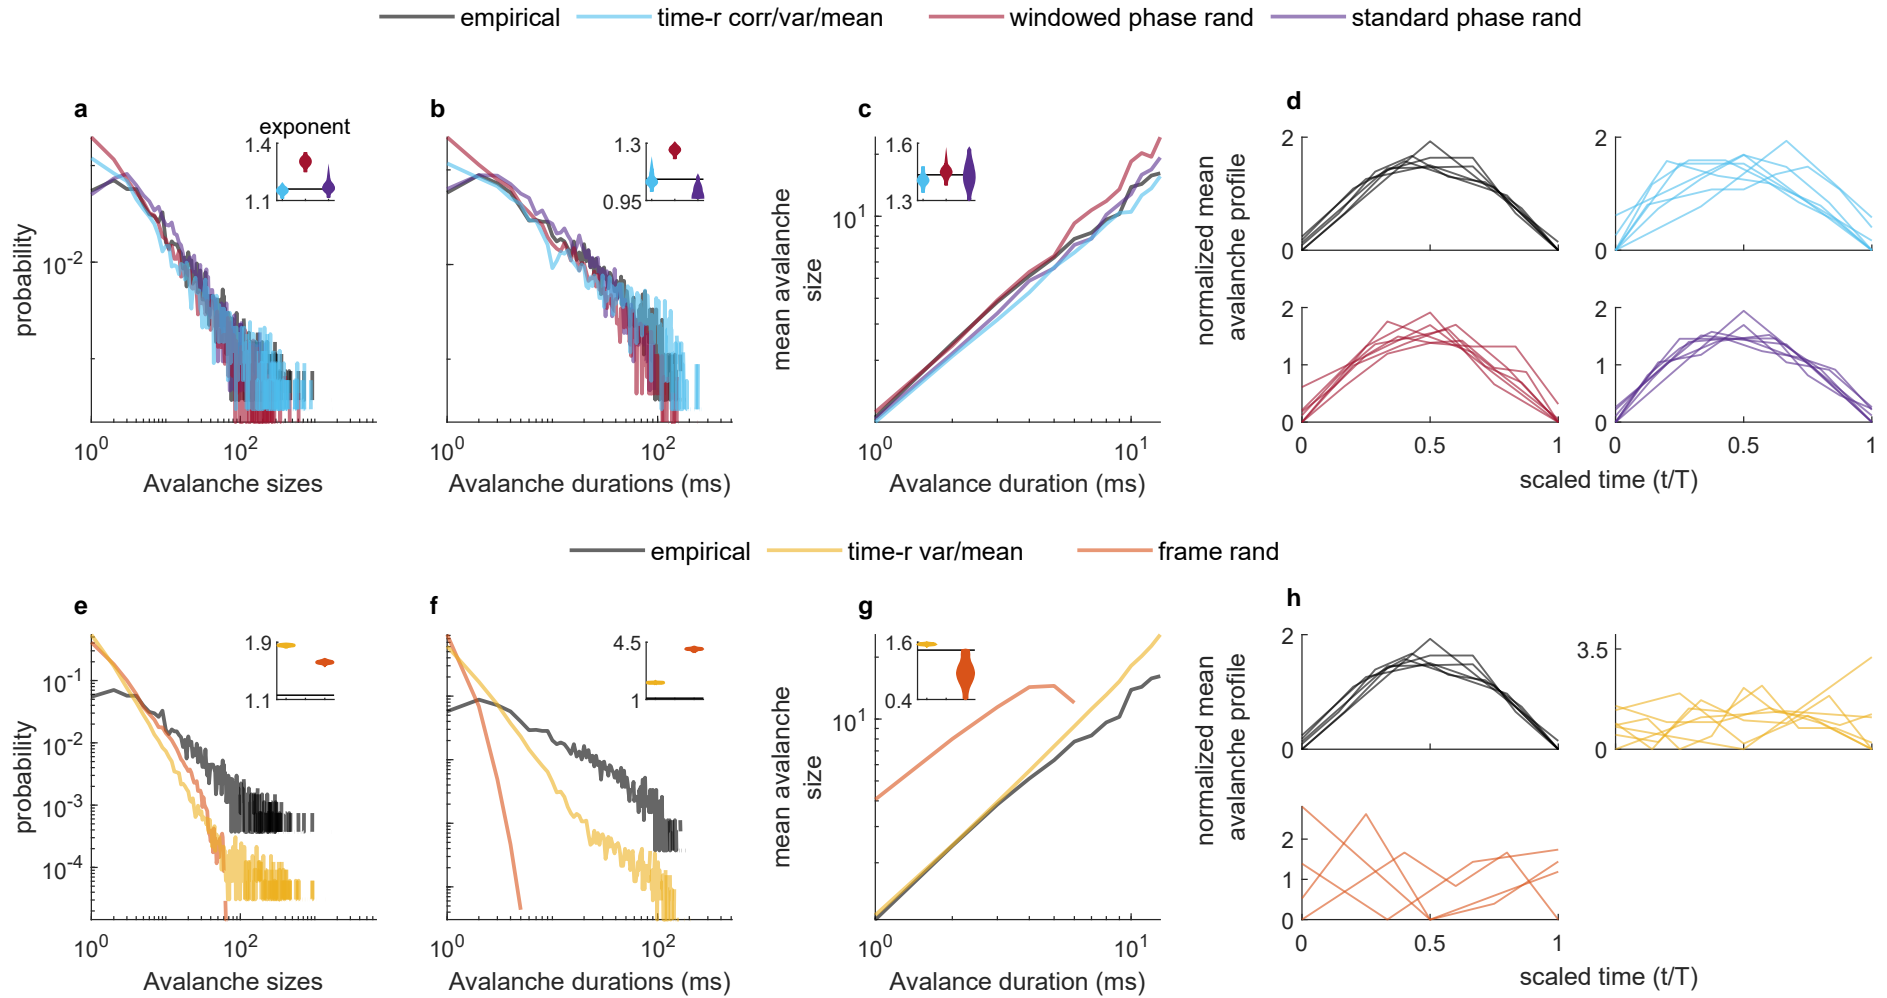

Supplementary Figure 25: See Figures 7-8 caption for details.

## Avalanche statistics — human intracranial EEG dataset 2

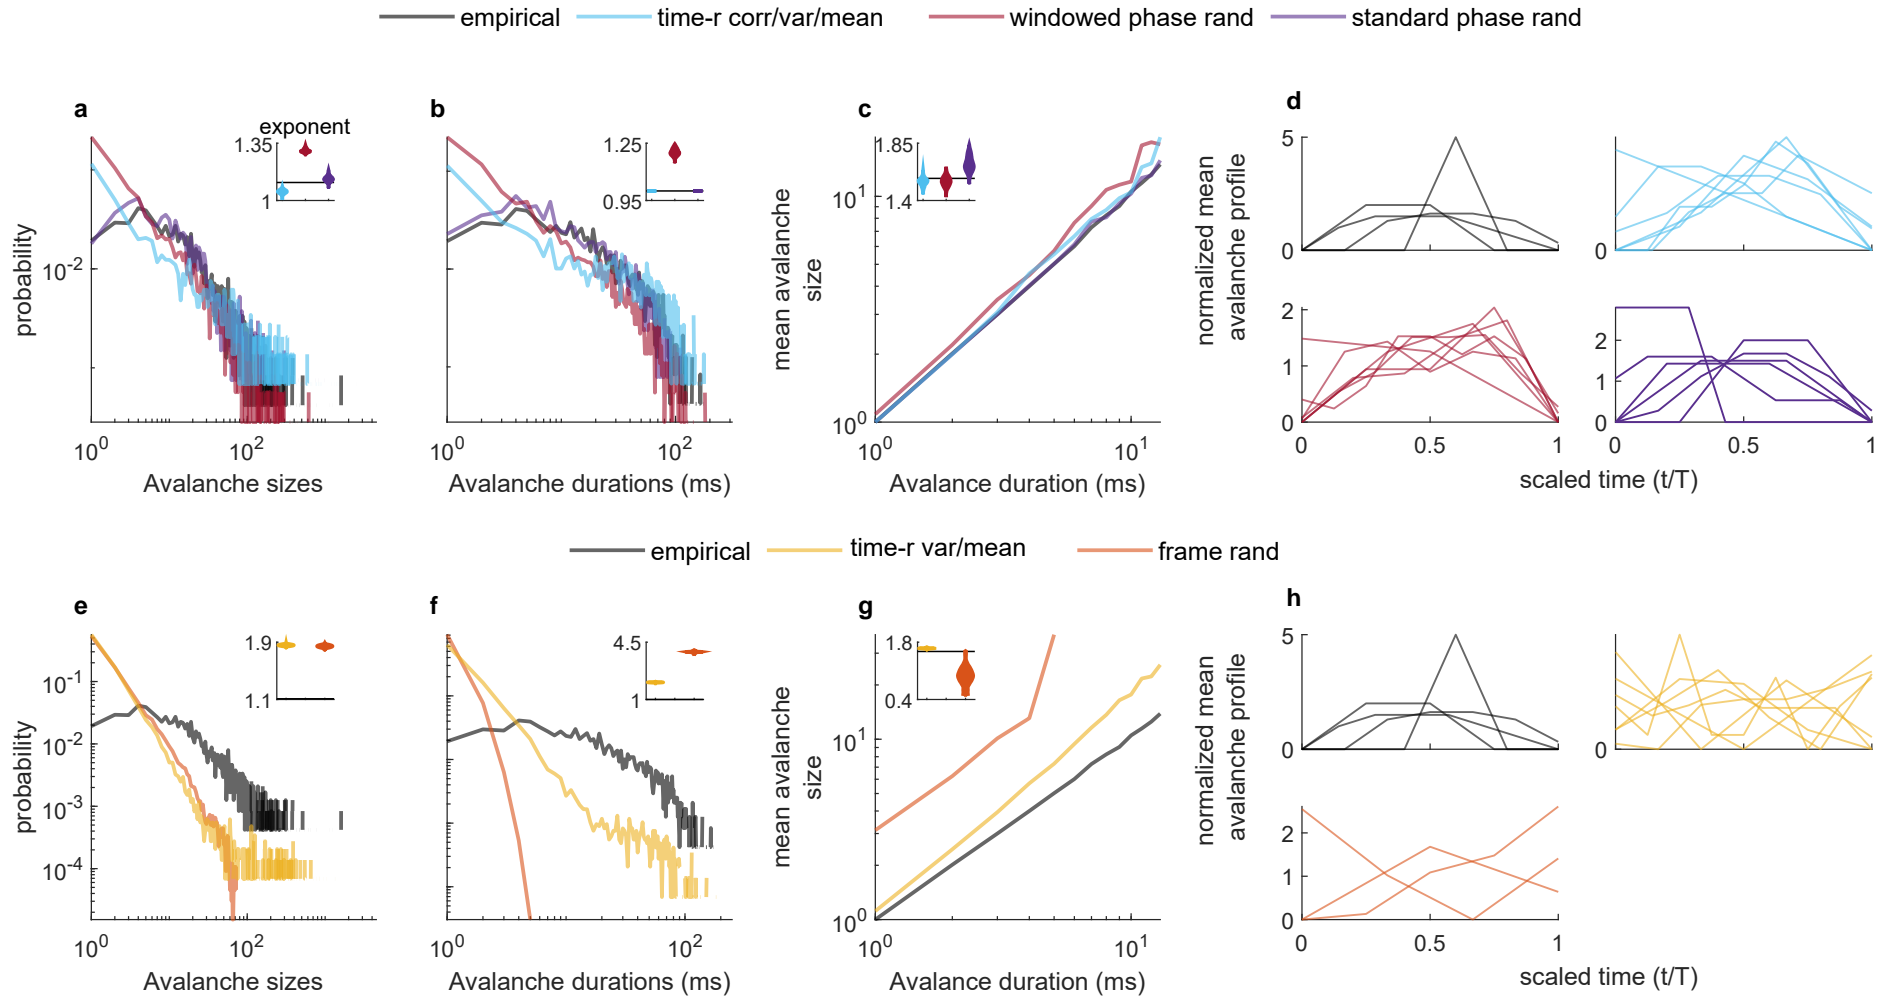

Supplementary Figure 26: See Figures 7-8 caption for details.

### Avalanche statistics — human intracranial EEG dataset 3

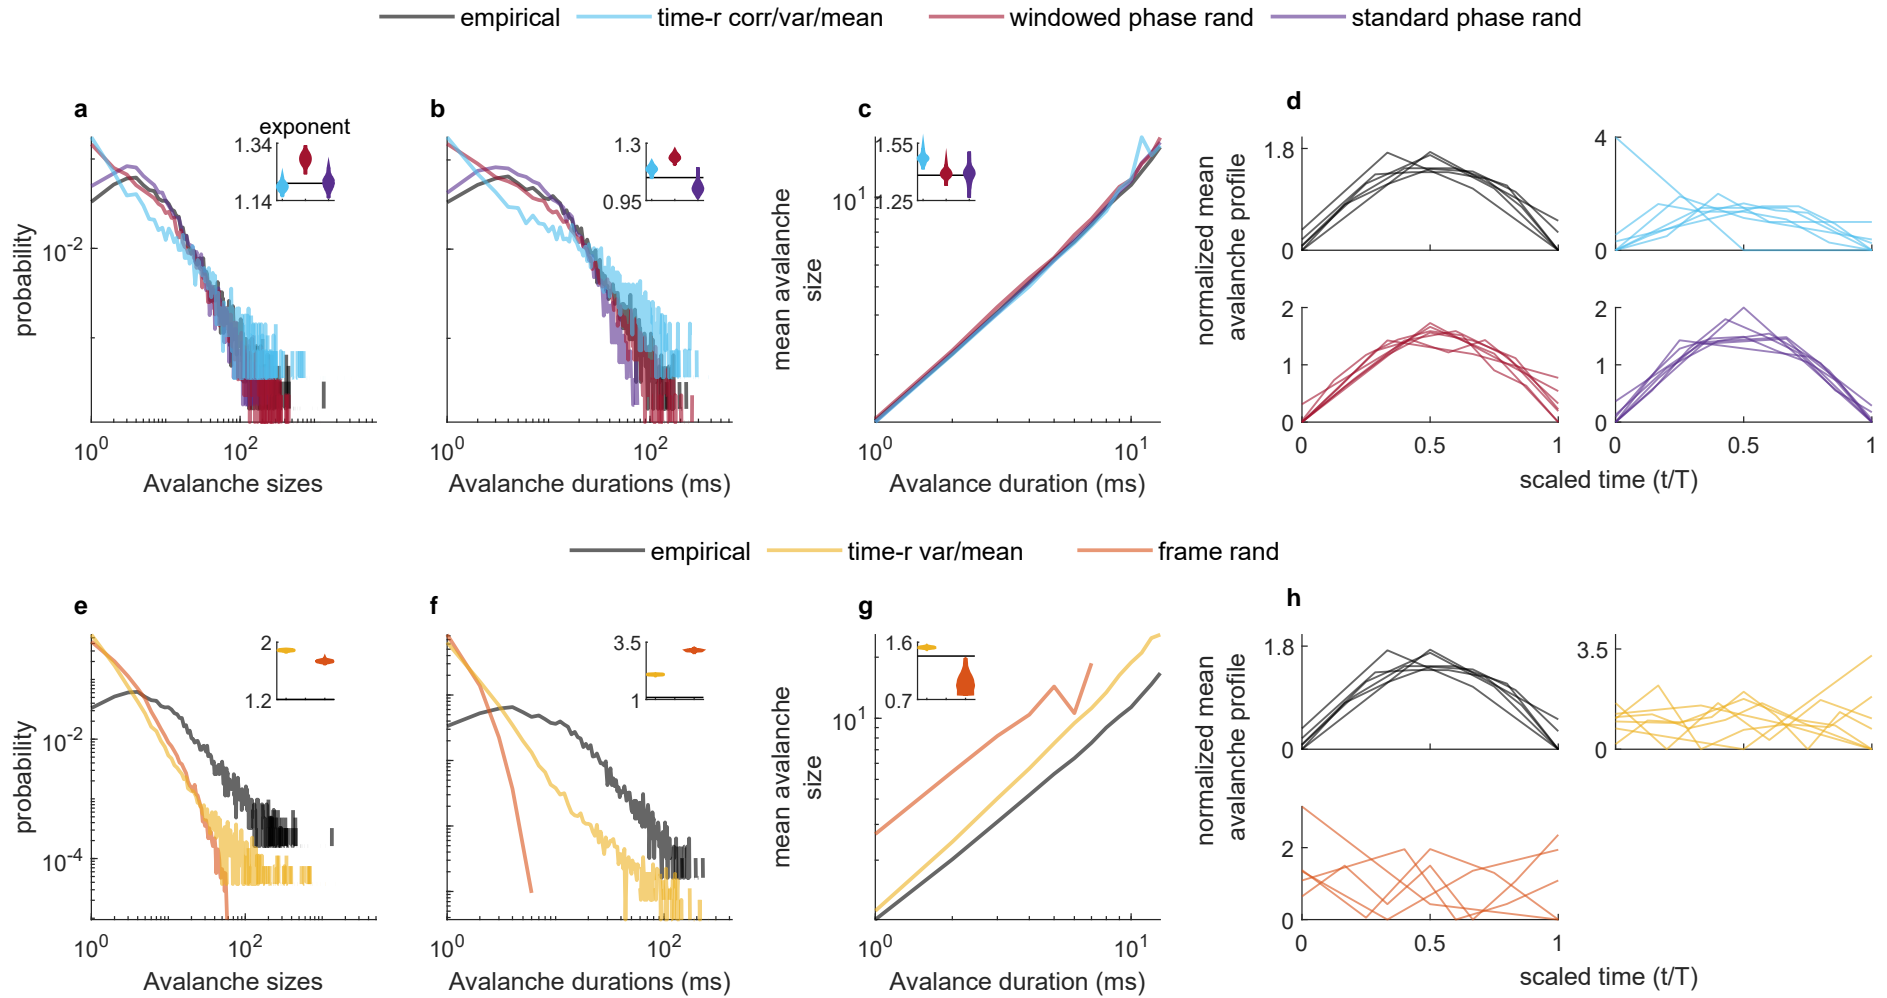

Supplementary Figure 27: See Figures 7-8 caption for details.

## Avalanche statistics — human intracranial EEG dataset 4

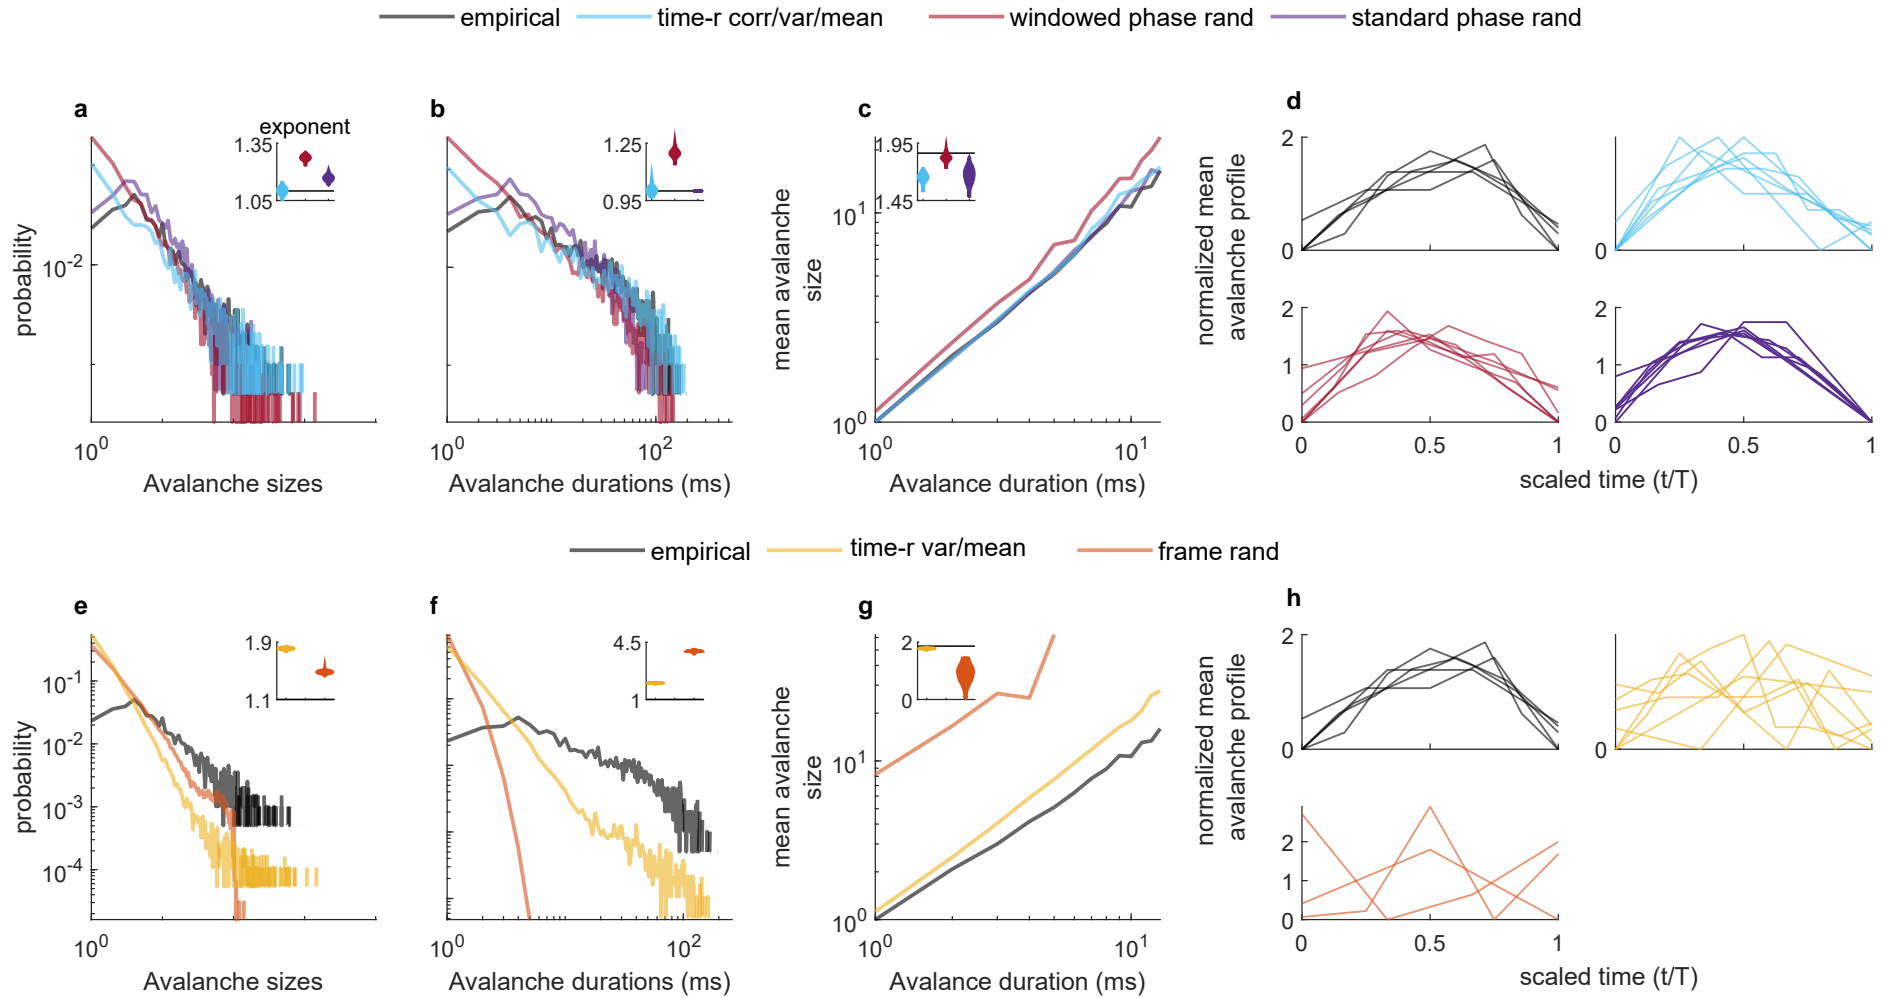

Supplementary Figure 28: See Figures 7-8 caption for details.

## Avalanche statistics — human stereotactic EEG dataset 1

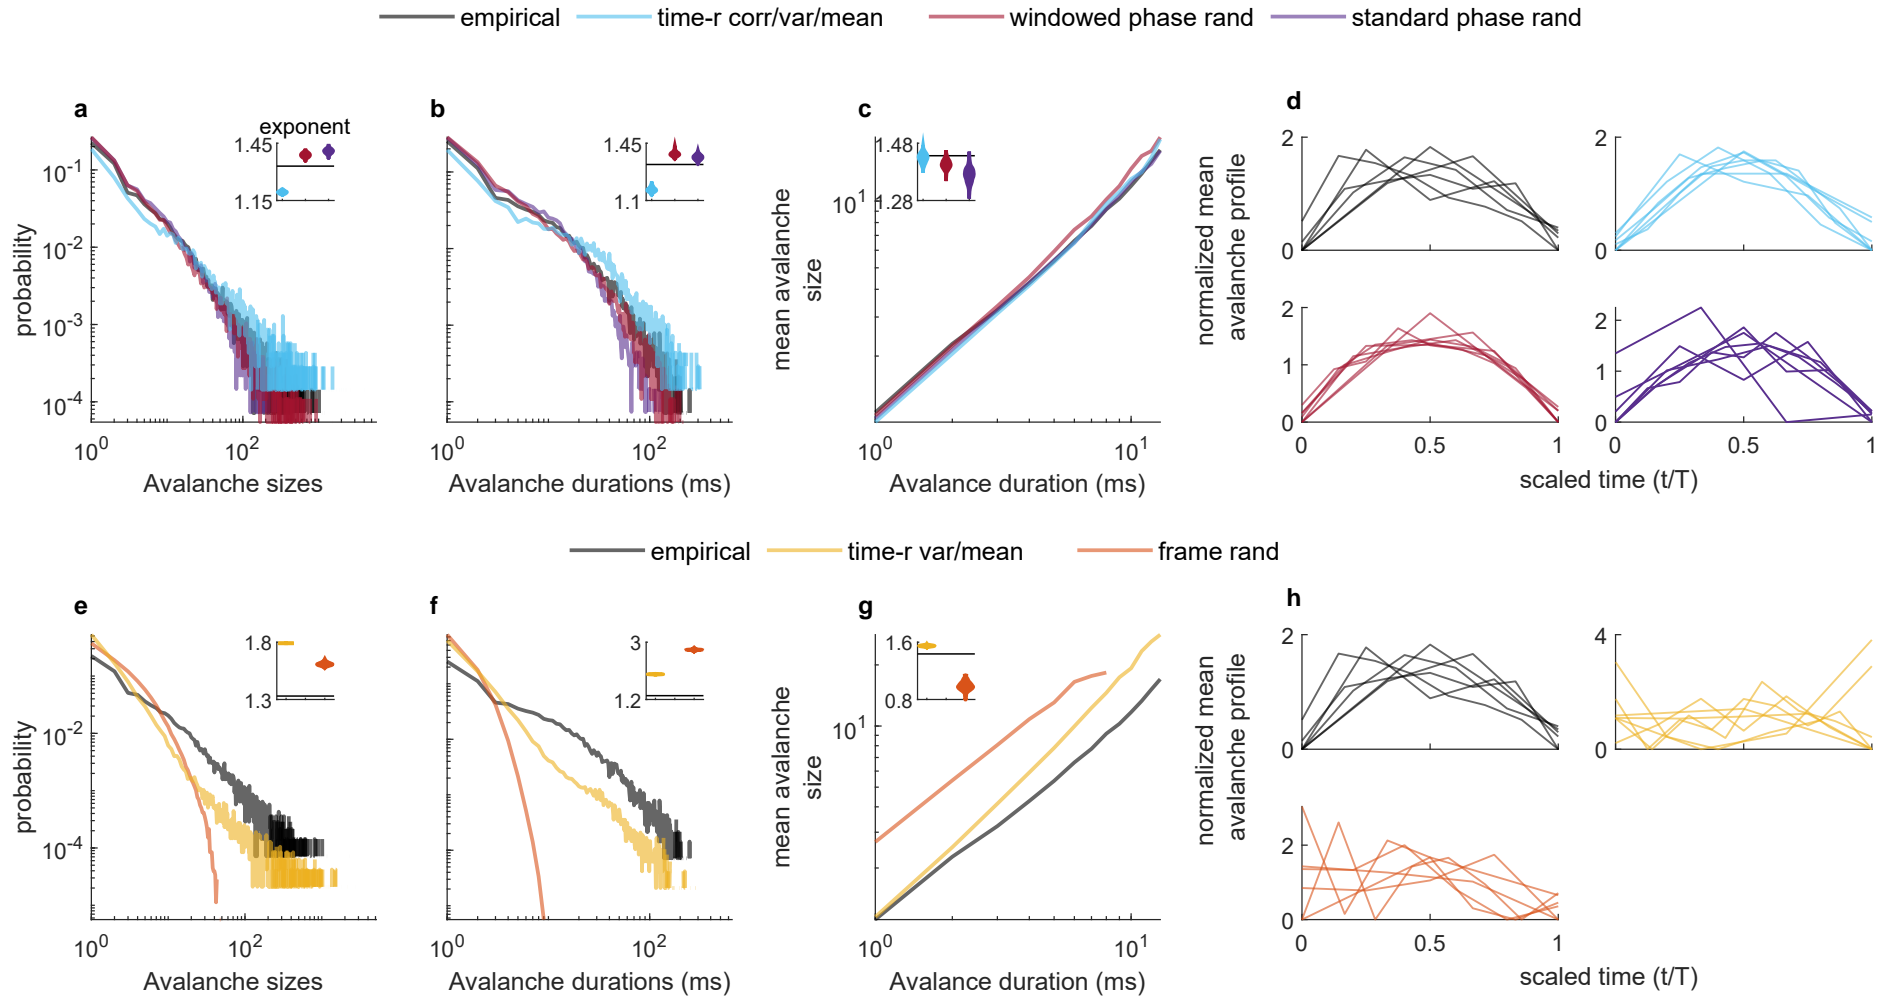

Supplementary Figure 29: See Figures 7-8 caption for details.

## Avalanche statistics — human stereotactic EEG dataset 2

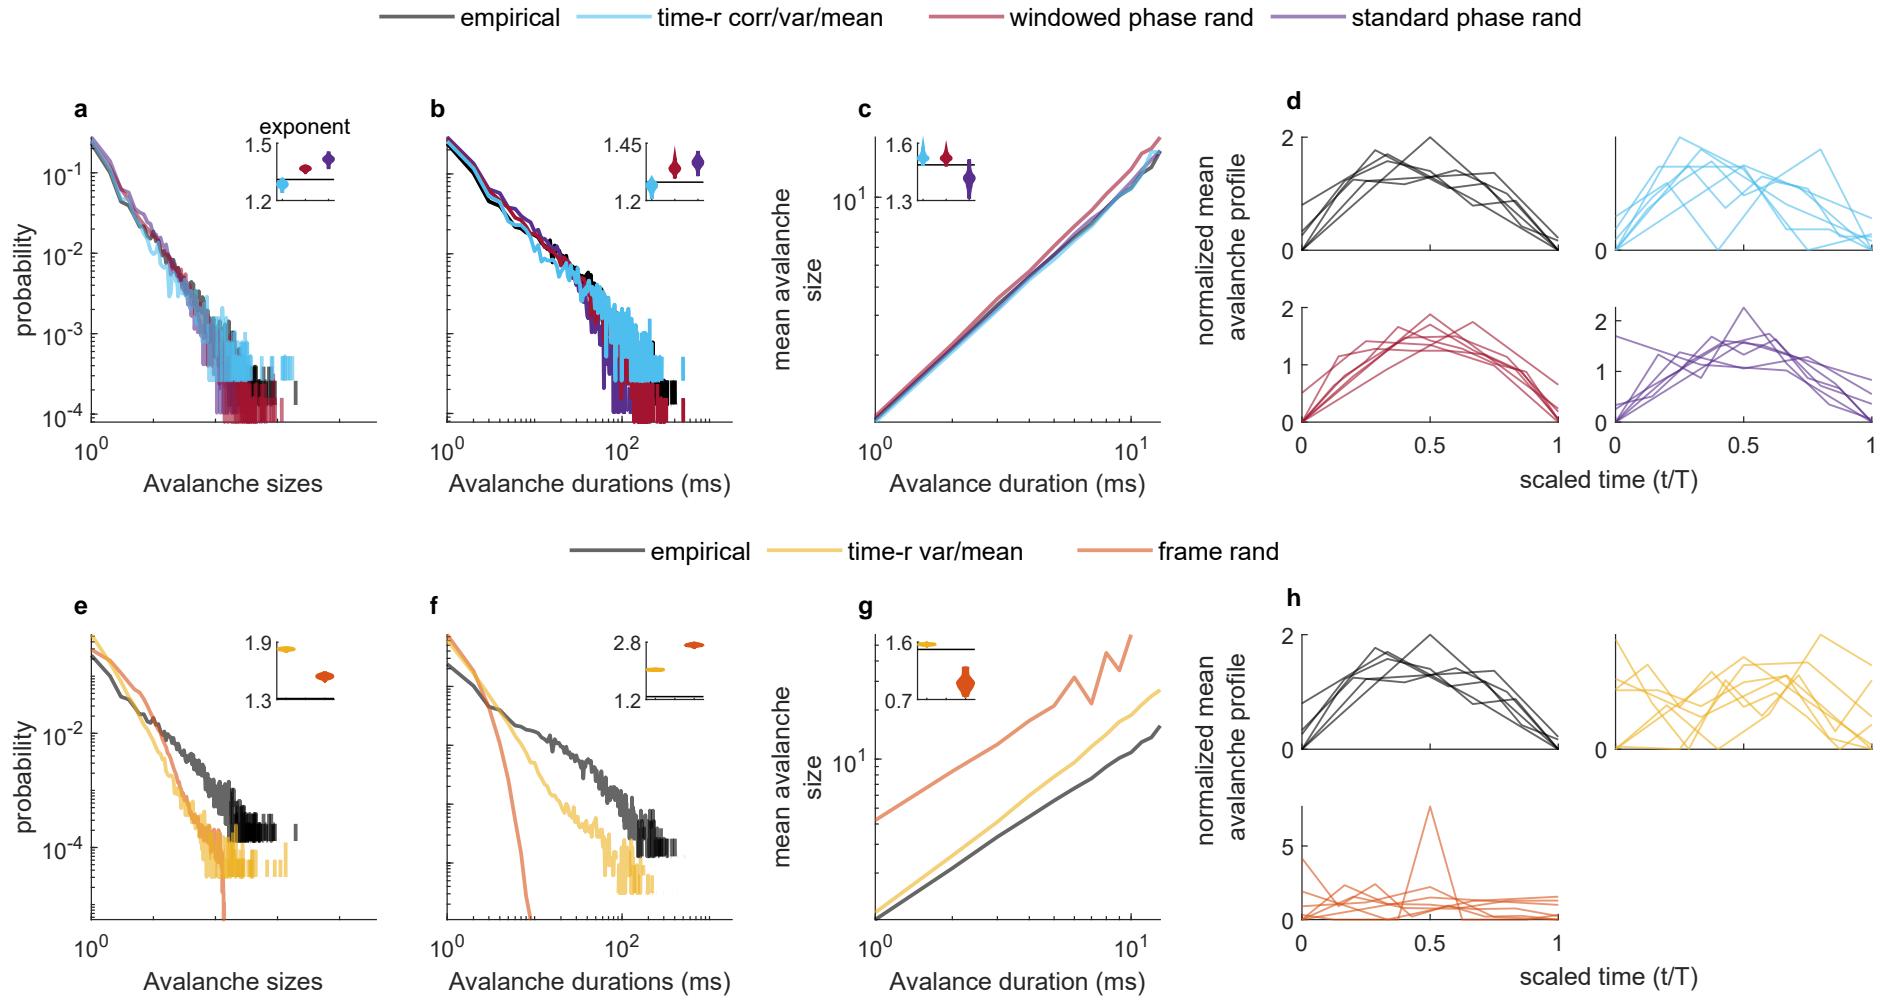

Supplementary Figure 30: See Figures 7-8 caption for details.



## Avalanche statistics — human stereotactic EEG dataset 3

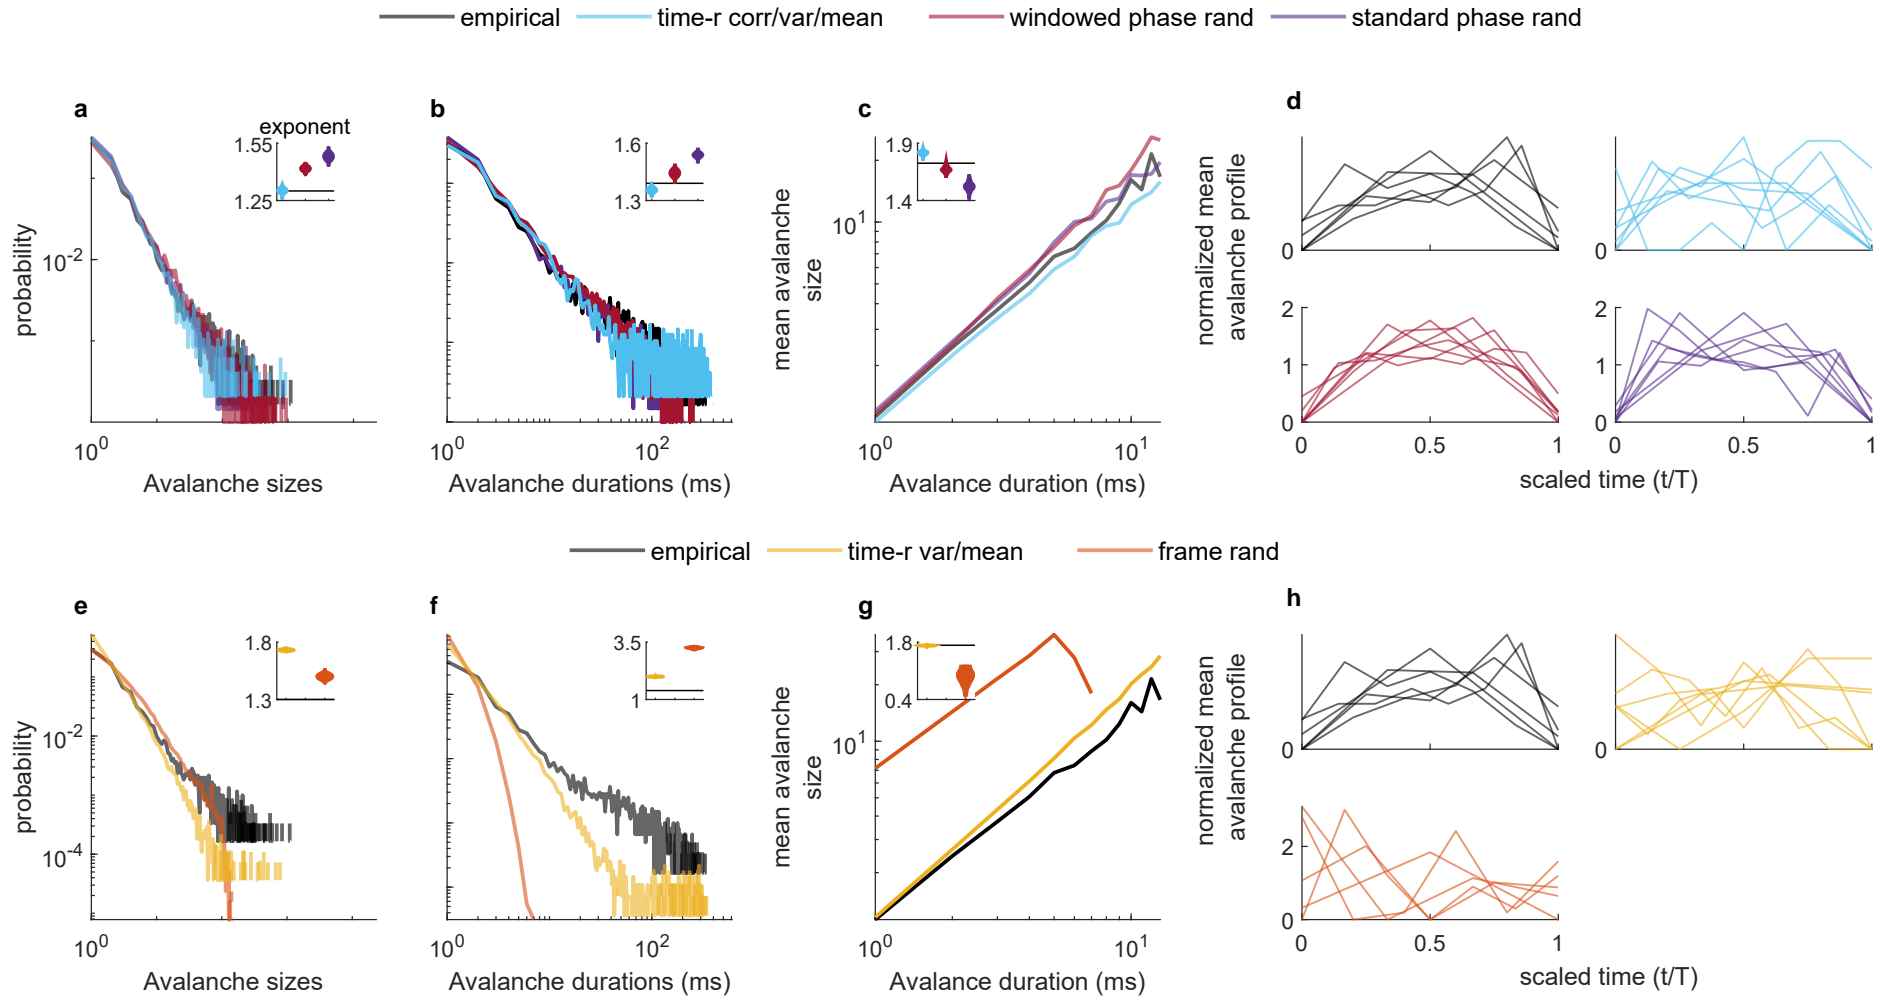

Supplementary Figure 31: See Figures 7-8 caption for details.

## Avalanche statistics — zebrafish dataset 1

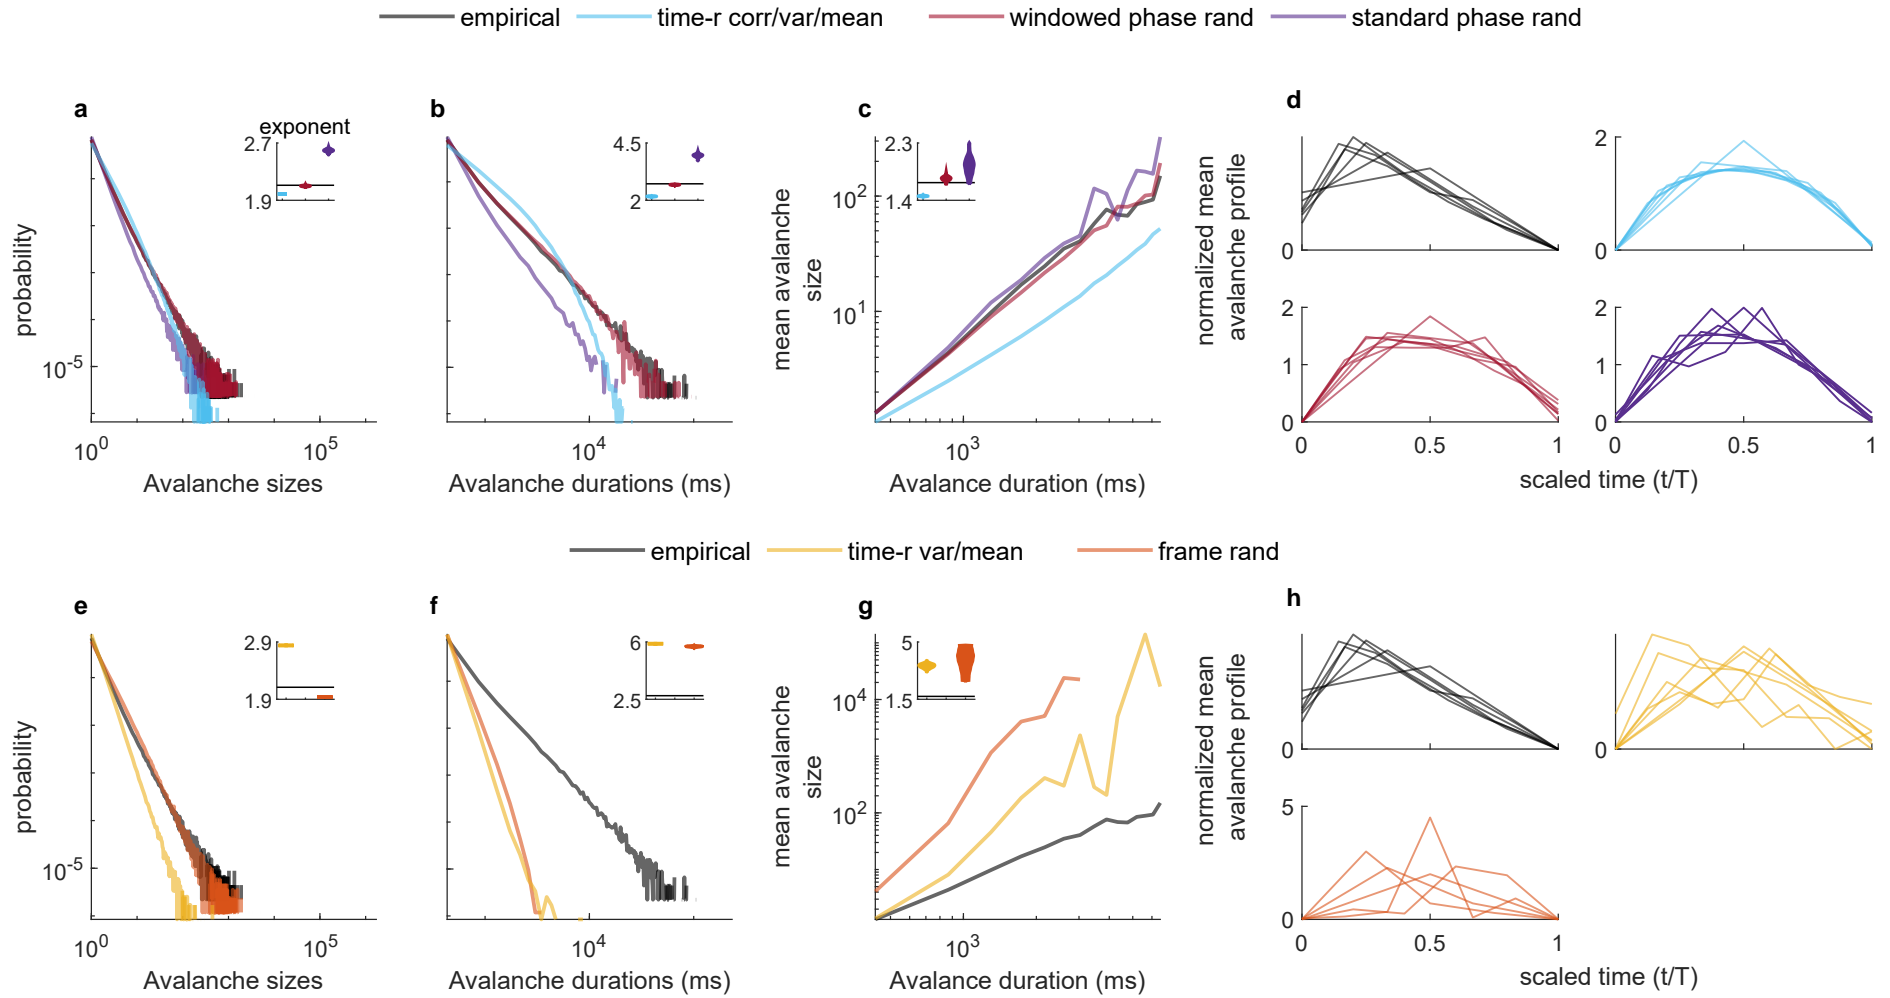

Supplementary Figure 32: See Figures 7-8 caption for details.

## Avalanche statistics — zebrafish dataset 2

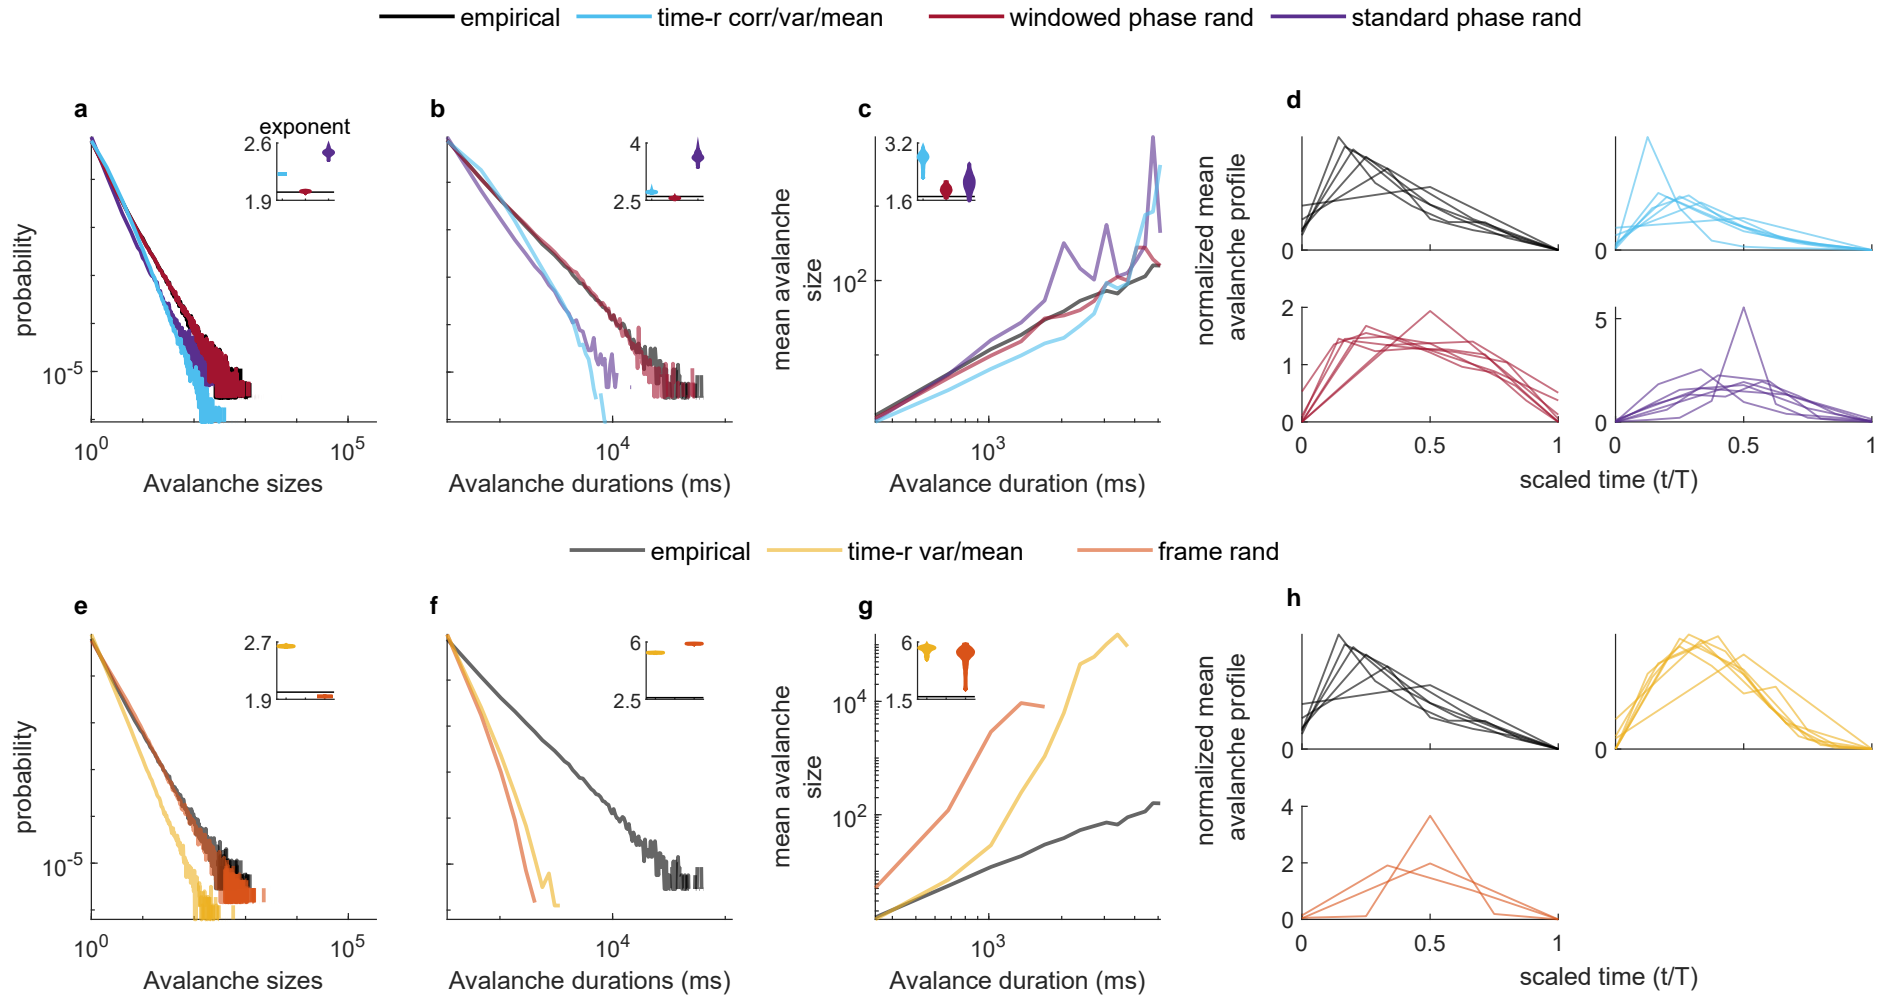

Supplementary Figure 33: See Figures 7-8 caption for details.
